# Validation and automation of a high-throughput multi-targeted method for semi-quantification of endogenous metabolites from different biological matrices using tandem mass spectrometry

Jatin Nandania <sup>1+</sup>, Gopal Peddinti <sup>2‡</sup>, Alberto Pessia <sup>1&</sup>, Meri Kokkonen <sup>1§</sup>, Vidya Velagapudi <sup>1\*</sup>

<sup>1</sup> Metabolomics unit, Institute for Molecular Medicine Finland (FIMM), University of Helsinki, HiLIFE, Tukholmankatu 8, Biomedicum 2U, 00290, Helsinki, Finland.

<sup>2</sup> Computational Systems Medicine group, University of Helsinki, 00290, Helsinki, Finland.

Present addresses:

+Roche Diagnostics GmbH, Nonnenwald 2, 82377 Penzberg, Germany.

#VTT Technical Research Center of Finland, P.O Box 1000, 02044 Espoo, Finland.

&Network Pharmacology for Precision Medicine group, University of Helsinki, 00290, Helsinki, Finland.

§Finnish Customs Laboratory, Tekniikantie 13, 02150 Espoo, Finland.

\* Corresponding author: [vidya.velagapudi@helsinki.fi](mailto:vidya.velagapudi@helsinki.fi); Tel.: +358 50 317 5087

**Abstract:** The use of metabolomics profiling to understand metabolism under different physiological states has increased in recent years, which created the need for robust analytical platforms. Here, we present a validated method for targeted and semi-quantitative analysis of 102 polar metabolites that covers major metabolic pathways from 24 classes in a single 17.5-min assay. The method has been optimized for a wide range of biological matrices from various organisms, and involves automated sample preparation, and data processing using in-house developed R package. To ensure reliability, the method was validated for accuracy, precision, selectivity, specificity, linearity, recovery, and stability according to European Medicines Agency guidelines. We demonstrated excellent repeatability of the retention times (CV<4%), calibration curves ( $R^2 \geq 0.980$ ) in their respective wide dynamic concentration ranges (CV<3%), and concentrations (CV<25%) of quality control samples interspersed within 25 batches analyzed over a period of one-year. The robustness was demonstrated through high correlation between metabolite concentrations measured using our method and NIST reference values ( $R^2=0.967$ ), including cross-platform comparability against the BIOCRAATES AbsoluteIDQp180 kit ( $R^2=0.975$ ) and NMR analyses ( $R^2=0.884$ ). We have shown that our method can be successfully applied in many biomedical research fields and clinical trials, including epidemiological studies for biomarker discovery. In summary, a thorough validation demonstrated that our method is reproducible, robust, reliable, and suitable for metabolomics studies.

**Keywords:** High-throughput; targeted; semi-quantitation; metabolomics; LC-MS; multi-analyte method; validation; cross-platform comparability; automation; biomarkers.

---

## 44 1. Introduction

45 Metabolomics has a great influence on many disciplines, as metabolites are intermediates or end  
46 products of cellular functions. Hence, metabolomics can be used as a powerful tool to generate data  
47 for understanding, diagnosing, and managing different pathophysiological conditions. It is therefore  
48 essential to be able to identify and measure metabolites from different biological matrices [1].  
49 Although global metabolomics has been widely used in discovery studies for understanding cellular  
50 responses to normal and abnormal biological conditions, targeted metabolomics has more  
51 advantages for addressing biological questions in a more hypothesis-driven manner than global  
52 untargeted metabolomics [2]. Furthermore, targeted metabolomics can quantify metabolites that are  
53 low in abundance, which are difficult to assess using an untargeted approach.

54 An appropriate sample pretreatment is required to obtain reproducible and high quality  
55 quantitative data in targeted metabolomics. However, metabolites are present in a wide dynamic  
56 range with great diversity in physicochemical properties in the biological matrices [3]. Recent  
57 advancements in extraction techniques and automated approaches for sample preparation have  
58 partially satisfied the demands of targeted metabolomics. However, there are still many outstanding  
59 challenges, such as the matrix effect and laboratory-to-laboratory variation associated with sample  
60 preparation. Hence, standardization of sample preparation is a fundamental requirement in  
61 metabolomics studies [4].

62 Secondly, robust analytical methodology is required for accurate quantification of metabolites  
63 with good reproducibility over an extended period of time [5]. Molecular diversity is a major problem  
64 that hinders the separation of all pre-selected metabolites in a single chromatographic run and the  
65 detection of all separated metabolites with minimum technical variation [6]. Tandem mass  
66 spectrometry (MS) is a technique used predominantly due to its high sensitivity and high throughput  
67 for the detection of metabolites. A combination of MS and separation techniques is used to increase  
68 the sensitivity and reliability of analytical methods for the analysis of metabolites from complex  
69 biological matrices [7]. In addition, latest developments in triple quadrupole instrumentation  
70 strengthened the possibilities to develop multi-analyte methods in a single injection that yield reliable  
71 and quantitative data [8].

72 Even though liquid chromatography-mass spectrometry (LC-MS) is a method of choice in  
73 targeted metabolomics, obtaining accurate quantification and long-term data reproducibility remains  
74 an analytical challenge. This is due to limitations such as matrix effect, MS performance drift, and LC  
75 column contamination and aging [9]. Finally, although instrument vendor software for data  
76 processing provides some crucial functions such as peak integration (rendering the data from high-  
77 throughput metabolomics experiments into numerical values that represent metabolite  
78 concentrations), the lack of automation in downstream data processing and quality control remains  
79 a major bottleneck in high-throughput analyses. Thus, an efficient pipeline is necessary to enable  
80 rapid, accurate, and standardized processing of these data. Such a pipeline should facilitate  
81 automated analyses, while at the same time allowing the user to fine-tune the parameters for accurate  
82 data processing. Taken together, there is a need for development and validation of standardized,  
83 robust, and quantitative methods for large-scale targeted metabolomics studies in a high-throughput  
84 manner to minimize bias associated with sample preparation and the analytical technique used.

85 We have previously developed a robust, reproducible, and high-throughput targeted method  
86 for measuring 102 polar metabolites from various biological classes semi-quantitatively in a single  
87 injection [10,11]. The metabolites were selected according to the following criteria: have important  
88 roles in many biological processes, are known biomarkers in several diseases and technical feasibility  
89 for developing an analytical method that covers all the metabolites in a single assay. The selected  
90 metabolites come from 24 different classes (Table 1), covering a wide range of metabolic pathways.  
91 We created an in-house metabolite database by manually curating all the available information (i.e.,  
92 names, HMDB, PUBCHEM, KEGG Ids, chemical properties, reported normal and abnormal  
93 concentration ranges, links to their structures) from the Human Metabolome Database (HMDB).

94 The selected metabolites were separated by using Hydrophilic Interaction Liquid  
95 Chromatography (HILIC) and measured using triple quadrupole mass spectrometry (MS). Briefly,

96 after addition of an internal standards working solution, biofluid samples were extracted with 1%  
97 formic acid in 99% acetonitrile. Tissue samples were extracted using homogenization in two steps.  
98 Extraction was first performed with 1% formic acid in 99% acetonitrile; the second extraction used  
99 80/20% ACN/H<sub>2</sub>O+1% formic acid by protein precipitation followed by filtration through Ostro  
100 plates. After this step, 5  $\mu$ L of filtered sample extract was injected into an Acquity UPLC system  
101 coupled to a Xevo® TQ-S triple quadrupole mass spectrometer (Waters Corporation, Milford, MA,  
102 USA), which was operated in both positive and negative polarities with a polarity switching time of  
103 20 msec for metabolite separation and quantification. Multiple Reaction Monitoring (MRM)  
104 acquisition mode was selected for metabolite quantification. A detailed method description and  
105 instrument parameters are provided elsewhere [10,11]. Our method involves automated sample  
106 preparation for biofluid samples and minimal manual steps for non-biofluid samples. This reduces  
107 the analysis time and inter-batch variation and minimizes human error. Semi-quantification of the  
108 metabolites was performed using external calibration curves ( $R^2 \geq 0.980$ ) in their respective wide  
109 dynamic concentration ranges and 12 labeled internal standards were used for most of the  
110 metabolites to minimize matrix effects.

111 Several analytical methods have also been developed for semi-quantitative measurement of  
112 large number of metabolites in a single run [12-16]. Li et al [12] measured 610 metabolites from 60  
113 biochemical pathways. However, their method requires approximately 40 minutes to separate all the  
114 metabolites (with poor resolution for some metabolites). Furthermore, their method was not  
115 applicable to all biological matrices. Similarly, Wei et al [15] detected approximately 200 metabolites  
116 in 10 minutes from plasma. However, their method lacks information on validation and for other  
117 biological matrices. Yuan et al [16] also provided a protocol for detection of approximately 250  
118 metabolites in a single method. However, they did not use an automated platform and a drying step  
119 in their method increases the analysis time of the method overall. Our method has clear advantages  
120 compared to other published methods, including shorter analysis time, high throughput, automation,  
121 and semi-quantitation using individual external 11-point calibration curves along with 12 labeled  
122 internal standards. Furthermore, the method has been used in many biomedical and clinical studies  
123 for biomarker discovery [10,11,17-37].

124 The primary objective of this work is to show the robustness of our method through a thorough  
125 validation of our previously developed analytical method according to European Medicines Agency  
126 (EMA) guidelines. We also demonstrate automation of tedious and manual data processing tasks in  
127 high-throughput metabolomics analyses using an in-house developed R package. The R package  
128 automates various corrections and normalization steps to convert the raw peak area data to molecular  
129 concentrations for each compound in each sample and also provides quality evaluation of the data  
130 and reduces the manual work load significantly.

131

## 132 **2. Materials and Methods**

### 133 *2.1. Chemicals and reagents*

134 All metabolite standards were purchased from Sigma-Aldrich (St. Louis, MO, USA). Internal  
135 standards were ordered from Cambridge Isotope Laboratory, Inc. (Tewksbury, MA, USA). LC-MS-  
136 grade solvents, 2-propanol, acetonitrile, and methanol (HiPerSolv) were obtained from VWR  
137 International (Helsinki, Finland). Analytical-grade chemicals (formic acid, ammonium formate, and  
138 ammonium hydroxide) were obtained from Sigma-Aldrich. Deionized water (18 M $\Omega$ .cm at 25°C)  
139 used for solution preparation was made using a Milli-Q water purification system (Bamstead  
140 EASYpure RoDi ultrapure water purification system, Thermo scientific, Ohio, USA). Mouse tissues,  
141 including heart, liver, brain, spleen, and muscles were obtained from Innovative Research Laboratory  
142 (Novi, MI, USA). Whole blood was obtained from the Finnish Red Cross blood service (Helsinki,  
143 Finland), from which serum was prepared during method optimization and validation. Cell samples

144 were provided by our research collaborators. NIST Standard reference material (SRM) 1950 plasma  
145 was purchased from Sigma-Aldrich (Gillingham, UK).

146

## 147 2.2. Metabolite extraction protocol and instrumentation

148 All metabolites were extracted, separated with HILIC chromatography (Acquity BEH amide, 2.1  
149 X 100 mm, 1.7 $\mu$ ), and analyzed with a Waters Xevo TQ-S mass spectrometer using our previously  
150 published protocol [11]. The protocol for tissues and adherent cells was optimized for better recovery  
151 and chromatography and to cover a wide range of tissue and cell types with a single protocol. For  
152 tissue sample extractions, 90/10% ACN/H<sub>2</sub>O + 1% formic acid was used instead of 80/20% ACN/H<sub>2</sub>O  
153 + 1% formic acid during the second step of extraction. Additionally, during cell pellet sample  
154 extraction, 80/20% ACN/H<sub>2</sub>O+1% formic acid was replaced with 90/10% ACN/H<sub>2</sub>O + 1% formic acid.  
155 After optimization, we used the tissues protocol for analysis of various biological matrices, such as  
156 heart, liver, placenta, brain, muscles, spleen, *C. elegans*, *Drosophila* larvae, dental carries, dried blood  
157 spots, and fecal samples. The cell pellet protocol was used for all types of adherent cells and *E. coli*  
158 and *S. cerevisiae* samples. The biofluid protocol was used for all types of biofluids, such as blood,  
159 plasma, serum, cell culture supernatant, CSF, and urine.

160

## 161 2.3. Method Validation

162 Validation of the method was performed to verify various parameters and the reliability of the  
163 developed method for analysis of a large number of samples. The method was validated according  
164 to EMA guidelines for bioanalytical method validation in terms of selectivity, specificity, linearity,  
165 accuracy, precision, extraction recovery, matrix effect, and stability [38]. In addition, we used pooled  
166 healthy human serum samples as internal quality control (QC) samples in all studies to correct signal  
167 drift during sample runs and to improve confidence in the statistical data. QC samples at high,  
168 medium and low (for serum) or high and low concentration levels (for tissues) were prepared by  
169 spiking a mixed standard solution in their respective homogenized biological matrices to perform all  
170 the method validation experiments. We performed validation for commonly used biological samples  
171 in metabolomics analyses, such as biofluid (serum), tissue (liver, brain and spleen), and cell samples.  
172 An aqueous calibration curve was used to calculate the concentration values during the method  
173 validation. The instrument performance for response reproducibility and sensitivity was always  
174 verified by six consecutive injections of medium concentration solution at the start of any experiment.

### 175 2.3.1. Selectivity and specificity

176 The selectivity and specificity for each metabolite were investigated using serum-spiked samples  
177 (N=6) with known amount of standard. Chromatographic interferences from other endogenous  
178 compounds of the biological matrix at the retention time of the target analyte for a particular  
179 metabolite were verified. The chromatographic peaks from spiked samples were compared with the  
180 standards by the retention times and if required from their respective MRM spectra.

### 181 2.3.2. Linearity, accuracy, and precision

182 To assess the linearity, accuracy, and precision, six replicates of spiked QC samples at high,  
183 medium, and low concentrations along with calibration curve were injected on three separate days.  
184 Calibration curve standards of 11 points were prepared via serial dilution. The curve was plotted by  
185 using the peak area response ratios (standard/labeled standard) versus the concentrations of the  
186 individual metabolites. The calibration curve was constructed using the regression equations (linear  
187 and quadratic) by applying appropriate weighing factor and by transforming the axis (both  
188 instrument response and theoretical concentration) into logarithmic or square root function. The

189 accuracy was calculated as measured value divided by the nominal value at each concentration level  
190 of the calibration curve standards in all three batches. Inter- and intra-batch variability was calculated  
191 by measuring coefficient of variation (%CV) at each QC concentration level.

### 192 2.3.3. Recovery and matrix effect

193 The recovery efficiencies for each analyzed metabolite was determined by comparing analytical  
194 results from QC samples spiked with standards mixture before and after extraction using different  
195 concentrations. The spike concentrations covered the calibration range. The matrix effect (percentage  
196 of ion suppression or enhancement of the MS signal) was determined by comparing the analytical  
197 response of QC samples that were spiked after extraction with the analytical response of aqueous  
198 spiked samples (diluent spiked with respective concentrations of QCs). Since there were endogenous  
199 metabolites, we subtracted the endogenous concentrations from the samples that were spiked. This  
200 experiment was performed using six QC replicates.

### 201 2.3.4. Stability of the metabolites

202 Wet extract, freeze-thaw, and stock solution stability for all metabolites were determined to  
203 check the integrity of the analytes in solvents and in QC samples at different conditions. To determine  
204 the wet extract stability, six replicates of extracted QC samples were kept in the auto-sampler at 5°C.  
205 The same samples in the same sequence were reinjected with freshly extracted QC samples and the  
206 results were compared.

207 Freeze-thaw stability was evaluated up to three cycles by freezing and thawing the spiked QC  
208 samples stored at -80°C and comparing the concentrations against the freshly thawed and spiked QC  
209 samples.

210 Long-term stock solution stability for metabolite stock solutions and intermediate solutions were  
211 checked by comparing the mean peak area of freshly prepared solutions with stored solutions at 4°C.  
212 All stability experiments were performed with six replicates of QCs.

### 213 2.3.5. Sample carry-over

214 Sample carry-over was evaluated by injecting the highest standard concentration (ULOQ) of the  
215 metabolites in the calibration curve followed by a series of blank injections and lowest standard  
216 concentration (LLOQ). The blank samples were evaluated for any signal at the retention time of  
217 particular metabolites and signal intensities of the blank samples were compared with the LLOQ  
218 samples. The acceptance criteria for carry-over was set at 20% of the peak area corresponding to the  
219 LLOQ level as per the EMA guidelines for bioanalysis.

### 220 2.3.6. Quality control samples

221 Internal QC samples were prepared after separating serum from pooled healthy human  
222 blood samples. A volume of 350 µL of serum was aliquoted and stored at -80°C after providing a lot  
223 number and QC number. The concentration of QC samples that were incorporated in batches during  
224 the metabolomics studies were calculated for all the metabolites along with the experimental  
225 samples. Average concentrations (µmol/L) and %CV of the QC samples were calculated for each  
226 metabolite. The data were saved along with QC lot numbers, batch name, and run date. The QC data  
227 were collected from six different lots for a period of 5.5 years (N=539 replicates). An internal QC  
228 database has been maintained and used for quality checks.

### 229 2.3.7. Comparison with reference material

230 To evaluate the performance of our semi-quantitative method, commercially available standard  
231 reference plasma (NIST SRM 1950) [39] was analyzed using our method (N=8 replicates). The  
232 concentration values from the matched 17 metabolites were compared with the given standard  
233 reference values.

234



### 235 2.3.8. Cross-platform comparison

236 To further evaluate the robustness and performance of our method, we performed a cross-  
237 platform comparison using two completely different analytical platforms: (1) the commercially  
238 available AbsoluteIDQ p180 targeted metabolomics assay kit using LC-MS/MS and (2) a nuclear  
239 magnetic resonance (NMR) platform. We sent our internal QC samples to the BIOCRATES Life  
240 Sciences AG (Innsbruck, Austria) (N=3 replicates) and to the NMR Metabolomics Laboratory, School  
241 of Pharmacy, University of Eastern Finland (Kuopio, Finland) (N=3 replicates). Our QC samples were  
242 extracted and analyzed as described previously for the AbsoluteIDQ p180 kit [40] and for the NMR  
243 analysis of small molecules [41]. We compared these results with the results obtained from our  
244 method (N=4-5 replicates).

245

246

### 247 2.4. Statistical analyses

248 To estimate the median concentration values ( $\mu\text{mol/L}$ ) of the metabolites from QC samples (N=539),  
249 we fitted a linear mixed model with the MCMCglmm R package [42] using an expanded parameter  
250 formulation and default settings. Observed data was assumed to be log-normally distributed and  
251 corrected for the six different QC lots. Credibility intervals (95%) of median concentration values  
252 were computed from 20 000 samples of the posterior distribution. Error bars shown in the scatter  
253 plots are 95% confidence intervals, while the coefficient of determination  $R^2$  refers to the simple linear  
254 regression between the two plotted variables. Coefficient of variation (CV) percentages were  
255 calculated as a measure of variability. To automate the downstream processing of the data produced  
256 by the instrument vendor software (TargetLynx), we built a data processing package called "Unlynx"  
257 in R statistical programming language.

258

### 259 2.5. Automated data processing

260 The "Unlynx" package parses the output of TargetLynx software (i.e., raw data containing the  
261 concentration values in PPB units) and produces a processed dataset in an Excel spreadsheet after  
262 performing a series of preprocessing operations.

263 The preprocessing steps included the following:

- 264 (i) Molecular weight normalization, in which the ppb values are normalized by the molecular  
265 weight of each compound, thereby converting the data from ppb units to  $\mu\text{moles}$ .
- 266 (ii) Process efficiency correction for the semi-quantification of metabolites without internal  
267 standards.
- 268 (iii) Normalization using dilution factor for specific sample type if dilution was needed.
- 269 (iv) Cell number normalization (for cell samples) to convert the concentration values per million  
270 cells.
- 271 (v) Calculation of mean, standard deviation, and relative standard deviation (RSD) of molecular  
272 concentrations (resulting from the previous steps) for each phenotypic group.
- 273 (vi) Outlier detection in each phenotypic group; if the concentration value of a compound in a  
274 sample is more than one or two standard deviation (SD) away from the mean of the  
275 phenotypic group, then it is marked as an outlier in the Excel data set in two different colors.
- 276 (vii) QC check by comparing the RSD of QC samples in the current dataset against the internal  
277 database of QC sample RSDs (based on inter-day RSDs recorded over one year).

278

279

280

### 281 3. Results and Discussions

#### 282 3.1. Extraction method optimization

283 The primary objective of this work was to optimize and validate our previously published  
284 protocol for different types of biological matrices. For tissue samples (placenta, liver, heart, brain,  
285 spleen, and muscles), the sample volumes of the tissues and extraction solvent volumes were  
286 optimized to fit the concentrations of most of the metabolites within the linearity of calibration curve  
287 for reliable results. We observed that most of the metabolites can be semi-quantified within the  
288 calibration curve range with  $20 \pm 5$  mg of sample weight.

289 Furthermore, we optimized the protocol with extraction solvent for tissues and adherent cells.  
290 Some of the metabolites (in particular inositol, GABA, asymmetric dimethylarginine, symmetric  
291 dimethylarginine, spermidine, ribose-5-phosphate, and orotic acid) had poor separation and  
292 irreproducible chromatography. Interference of isobaric compounds with other metabolites was also  
293 observed due to poor separation. Thus, different compositions of the extraction solvent were assessed  
294 to achieve the acceptable chromatography. We observed that modification of acetonitrile content  
295 from 80% to 90% and applying longer equilibration time for the HILIC column yielded acceptable  
296 chromatography and also good separation for most of the metabolites.

297 We also optimized the extraction protocol for different sample types from various organisms,  
298 such as tissue types (adipose, endometrium, testicles, lung), fecal samples, dried blood samples,  
299 dental carries, biofilm, extracellular vesicles, mitochondrial isolates, drosophila, *C. elegans*, *E. coli*, and  
300 *S. cerevisiae* samples (Figure 1).  
301

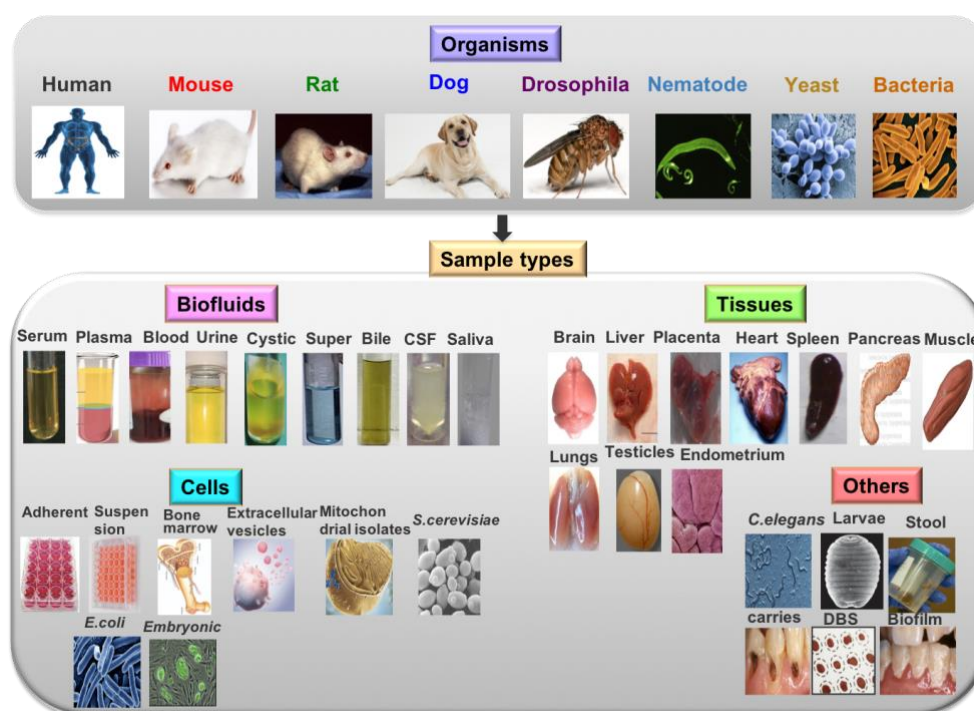

302

303 **Figure 1.** Illustration of different sample types from various organisms that have been used for extraction  
304 method optimization.

305

306

307

308

309 3.2. Method Validation

310 3.2.1. Selectivity and specificity

311 There were no significant interference peaks from the matrix components in their respective  
312 retention time windows, indicating the selectivity of the metabolites in our method. We repeated the  
313 injections for five times from all different serum samples and confirmed that the peak eluted was  
314 only from the target analyte, indicating that they are specific to their corresponding MRM transitions  
315 (Figure 2).

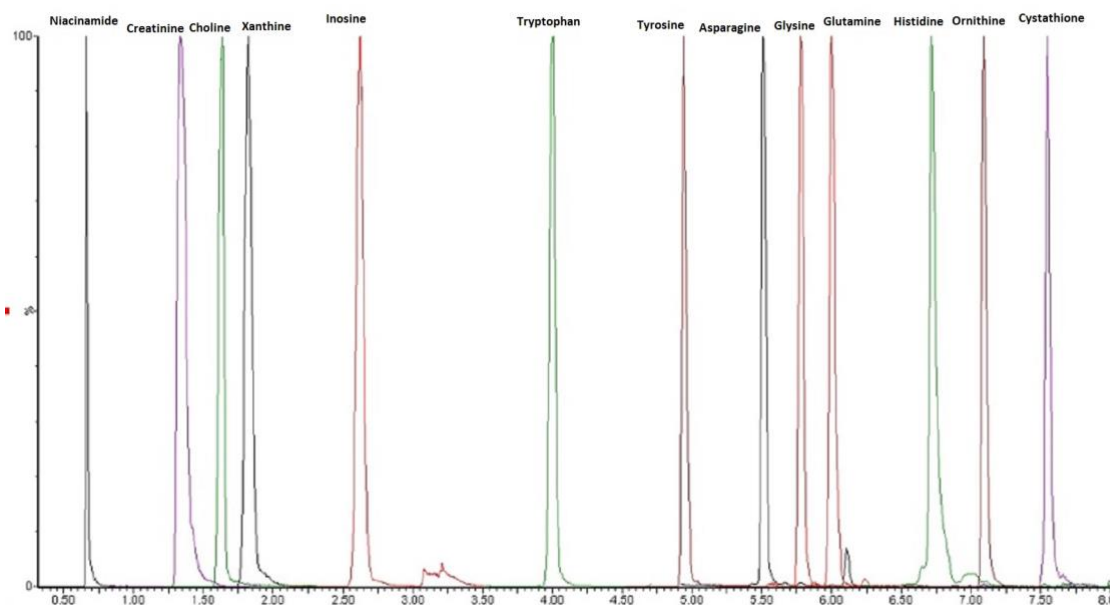

316 **Figure 2.** Representative chromatographic peaks of selected metabolites at their respective retention times  
317 in the QC serum sample.

318 3.2.2. Linearity, accuracy, and precision

319 To cover a broad concentration range, the linear or quadratic models were used and the variables  
320 from X and Y axes were logarithm or squareroot transformed to fit the calibration data [43]. The  
321 coefficient of determination ( $R^2$ ) value for each metabolite was greater than 0.980 at their respective  
322 concentration range, except for some metabolites such as aspartate, uracil, 2-deoxyuridine sucrose,  
323 and chenodeoxycholic acid (likely due to their broad peak shapes and poor recovery at lower  
324 concentration, Table S1).

325 Concentration precision for QC samples was calculated by measuring %CV at high, medium,  
326 and low concentration level of QCs (N=6 replicates). In general, intra- and inter-day precision (CV)  
327 values were within 15% for most of the metabolites except acetoacetic acid, folic acid, sucrose,  
328 homoserine, 2-deoxyuridine, and cholic acid (Figure 3). However, at low concentrations, more than  
329 20% CV were observed for NAD and myo-inositol. This might be due to the low recoveries of these  
330 compounds.

331



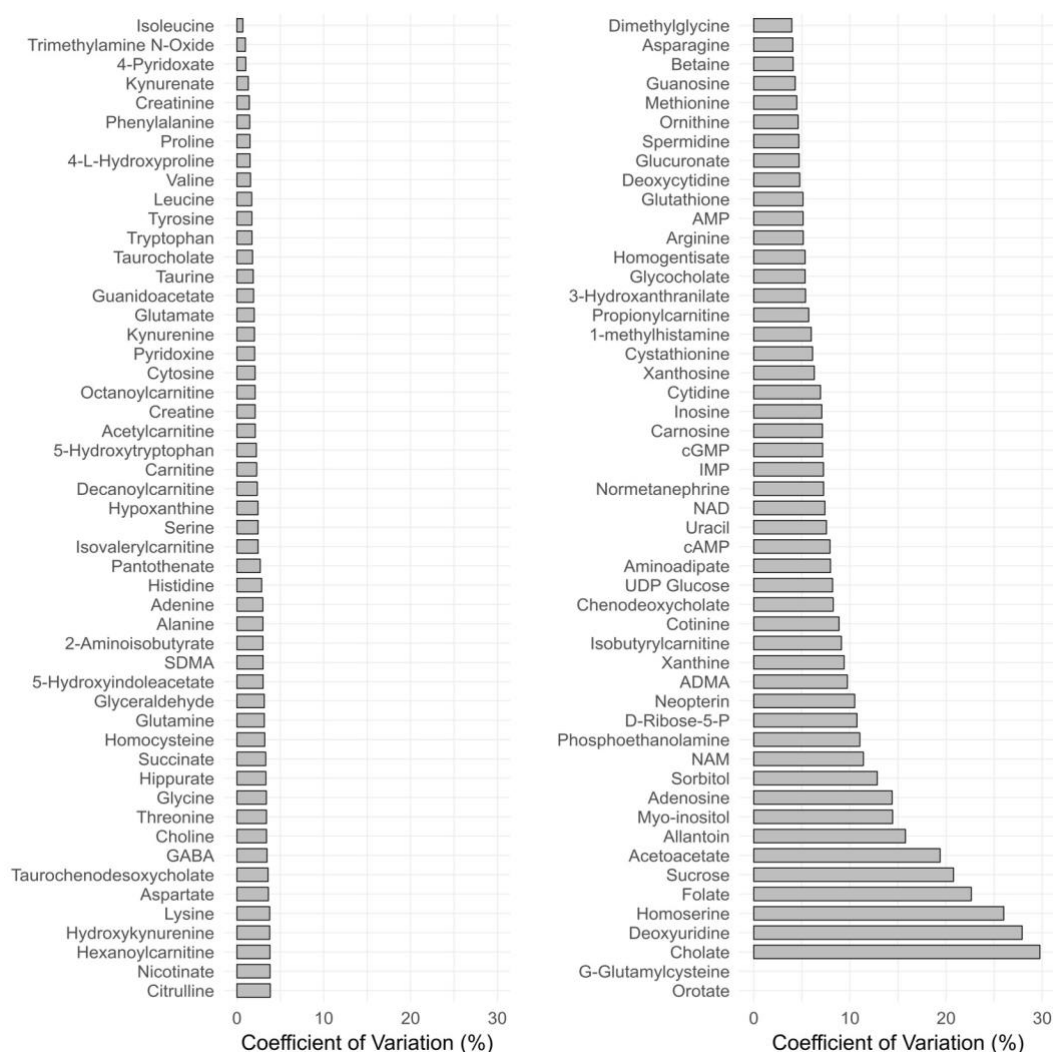

332 **Figure 3.** Inter-batch variation of high concentrations of spiked QC serum samples (N=6) analyzed on  
 333 3 different days. Data not shown for g-glutamylcysteine and orotic acid (CV>30%).

### 334 3.2.3. Recovery and matrix effect

335 For most of the metabolites, recoveries were found to be between 50% to 120% with good  
 336 repeatability at all three concentrations levels (low, medium, and high) in both biofluid (serum) and  
 337 tissues (brain, liver, and spleen). However, compounds such as UDP-glucose, IMP, cGMP, D-ribose  
 338 5-phosphate, NAD, AMP, homocysteine, carnosine, and glutathione had recoveries less than 30% in  
 339 serum. However, CV of recoveries at low, medium, and high concentration levels were within 25%  
 340 except for cGMP in serum. Metabolites such as 1-methylhistamine, aspartate, glutamine, adenosine,  
 341 and glutathione had recoveries over 120%. Histidine, ornithine, cystathionine, 3-OH-DL-kynurenine,  
 342 carnosine, AMP, NAD, cGMP, IMP, and UDP-glucose had less than 30% recovery in some tissues  
 343 types, indicating matrix effect or degradation (Figure 4). However, CV of repeatability at all  
 344 concentration levels were within 15% except for 1-methylhistamine, aspartate, glutamine,  
 345 glutathione, NAD, and UDP-glucose in some tissues.

346 The matrix effect values were observed to be within the range of 0.6 to 1.8 (below 1 indicates ion  
 347 suppression and above 1 indicates ion enhancement) for the metabolites in serum and tissues. The  
 348 challenge of the matrix effect can be overcome by having individual isotope-labeled internal  
 349 standards for each individual compound for true quantification. However, this is not practically  
 350 possible for high-throughput metabolomics analyses, where usually the aim is relative comparison  
 351 of cases *vs* controls. This is due to high costs and also because not all internal standards are

352 commercially available. In our method, we selected 12 labeled internal standards (Table S1), which  
353 represent chemically similar classes for optimal correction. This is because the matrix effect was  
354 expected to be the same for an analyte and its labeled isotope analogue. The process efficiency  
355 percentages were calculated for the metabolites without internal standards. The analyte  
356 concentrations determined through the external calibration were divided with the total process  
357 efficiency values to correct the concentration values of the analyte in the given biological sample.  
358 Also, the repeatability of matrix effect in terms of CV was less than 25% for most of the compounds.  
359 Reliable measurements are accordingly possible.

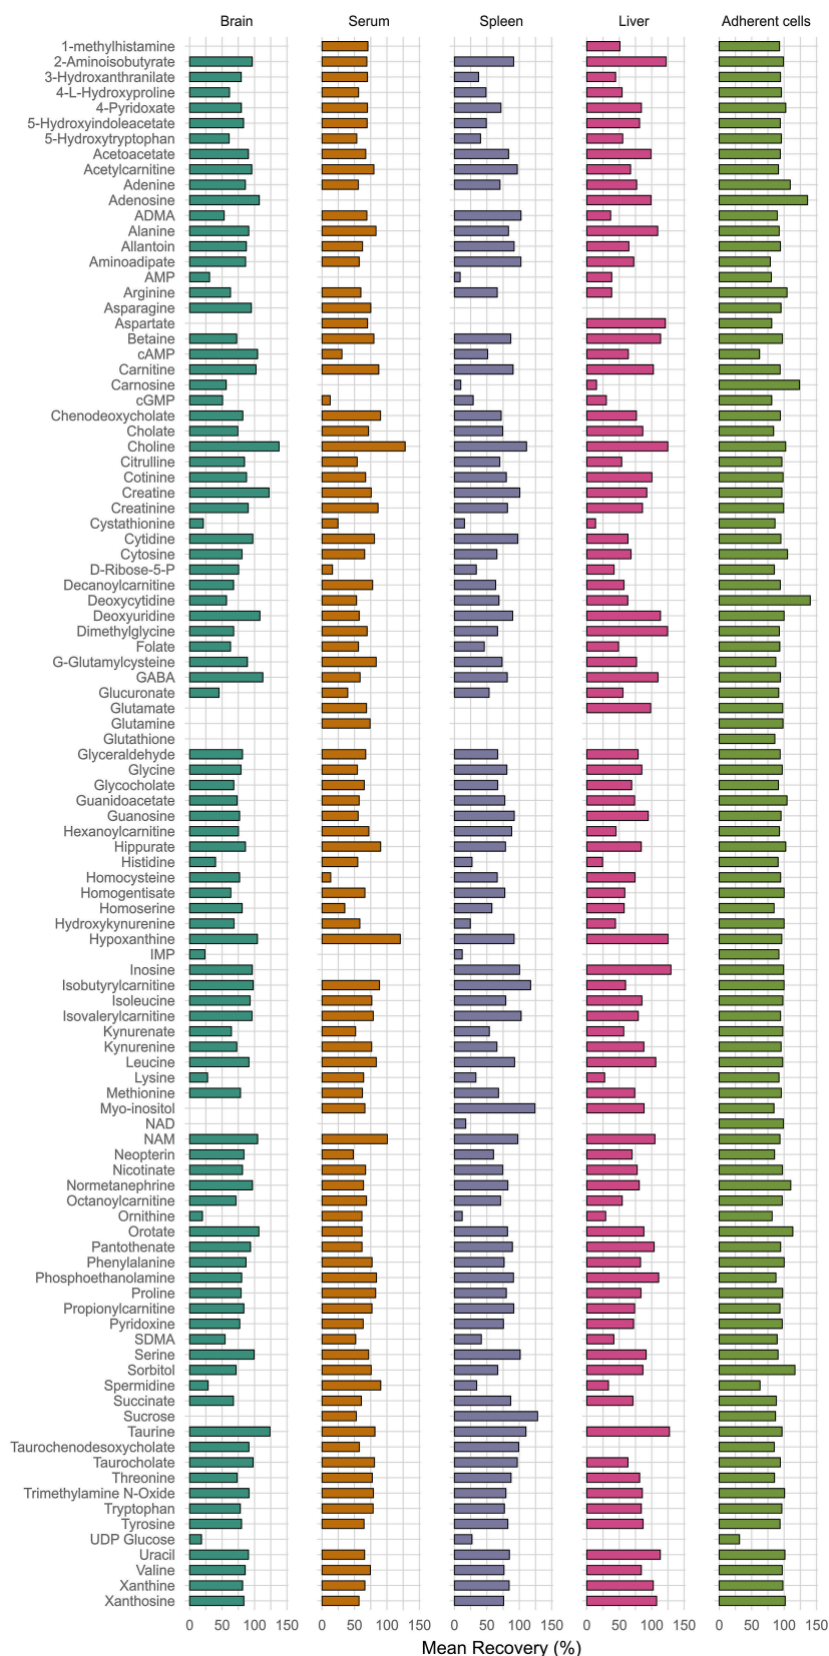

360

361

362

363

**Figure 4.** Percentage mean recoveries for all metabolites at low, medium, and high concentration levels of QCs (N=6 at each level) spiked in serum, brain, spleen, liver, and adherent cells. Data not shown for metabolites with poor chromatography and irreproducible results at different concentration levels.

364

365 3.2.4. Stability

366 Endogenous metabolites are not stable due to degradation or conversion reactions. Hence, the  
367 stabilities of all metabolites were assessed under different conditions. For wet extract stability,  
368 approximately 90% of the metabolites were stable (stabilities range between 85% and 115%) for 35  
369 hours at 5°C in the auto-sampler (Figure 5A).

370 For freeze and thaw cycle stability, most of the metabolites were stable even after three freeze  
371 and thaw cycles, with the exception of cGMP, succinate, glutathione, and homocysteine (stability  
372 below 30%, Figure 5B). This information is particularly important for clinical studies, where samples  
373 are often thawed once or twice.

374 To determine the stability of working solutions, we started evaluating the stability from  
375 intermediate solutions for all the metabolites. Most of the metabolites were stable for 245 days at  
376 intermediate concentration when stored at 4°C. However, 16 metabolites had low stability at  
377 intermediate concentration; stabilities were thus determined at stock-level concentration for these  
378 compounds. We observed that the stock solutions were stable for 56 days except taurocholic acid,  
379 sucrose, UDP-glucose, and glutamine (Figure 6). Hence, these stock solutions were freshly prepared  
380 during the analysis. The stability of internal standards solutions was also assessed and they were  
381 stable for one year.

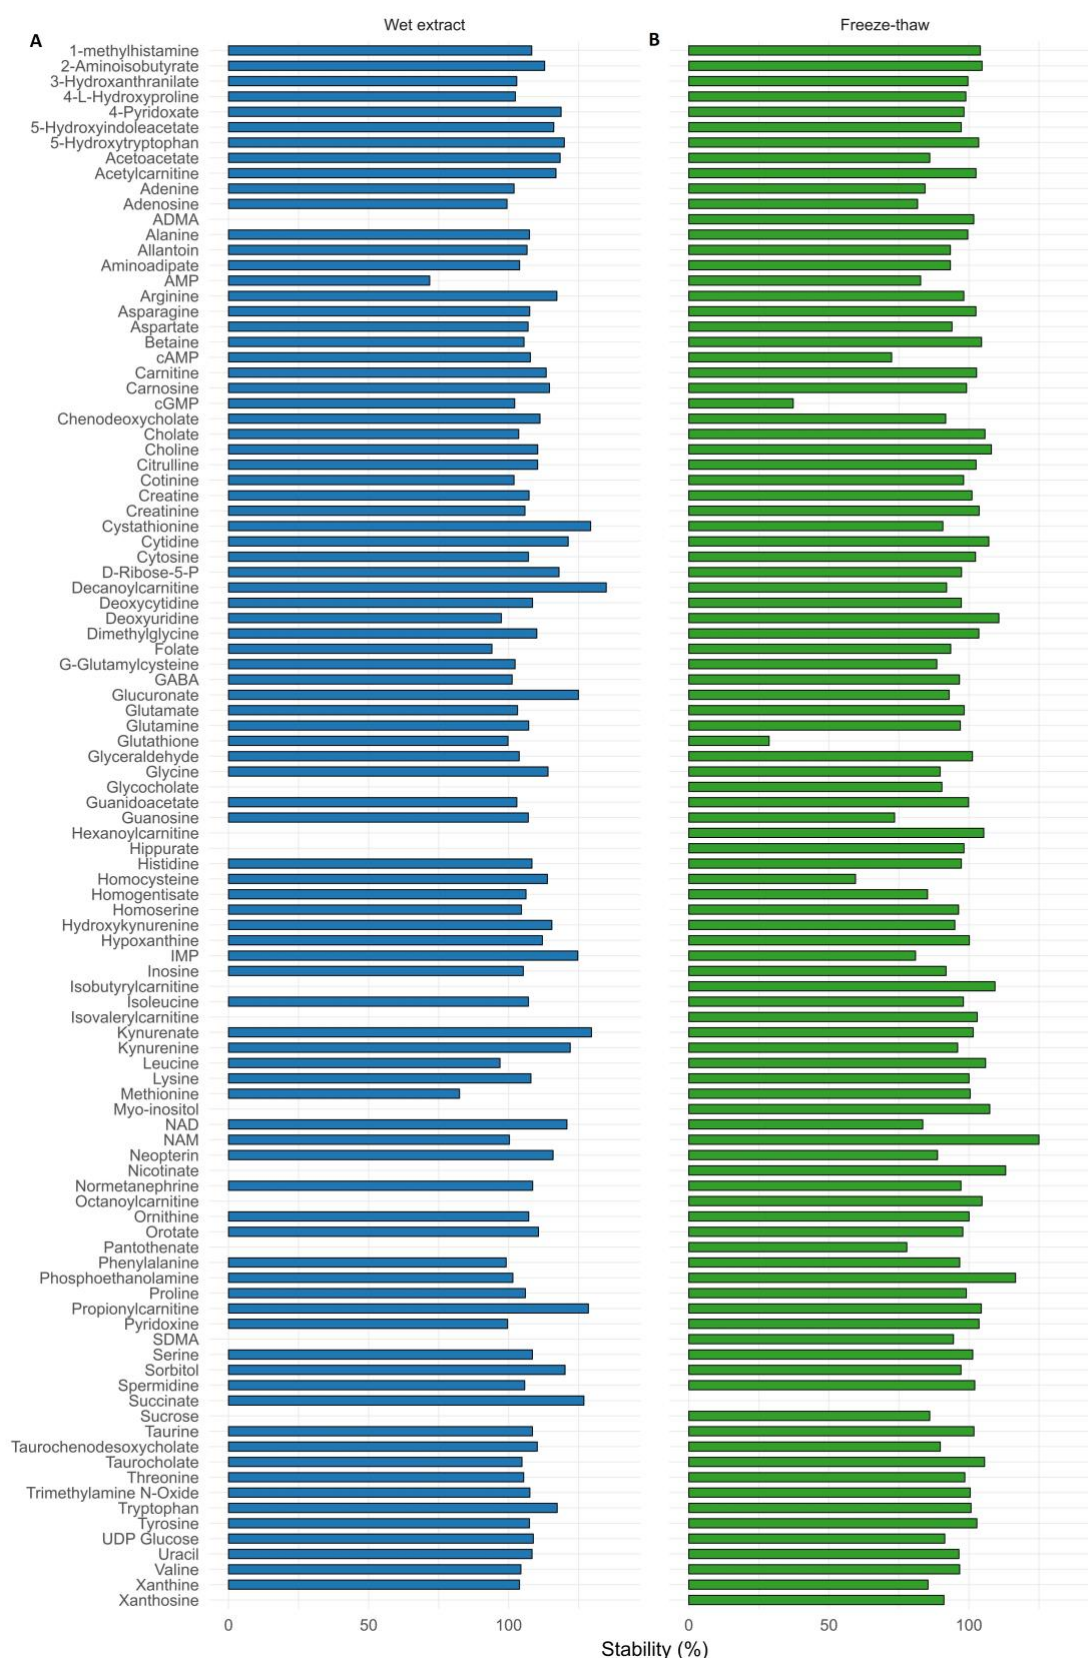

382  
383  
384

**Figure 5.** Percentage mean stability was calculated for three different concentrations (low, medium, and high) spiked in QC serum (N=6 at each level) during (A) wet extract and (B) freeze-thaw stability for all the metabolites.



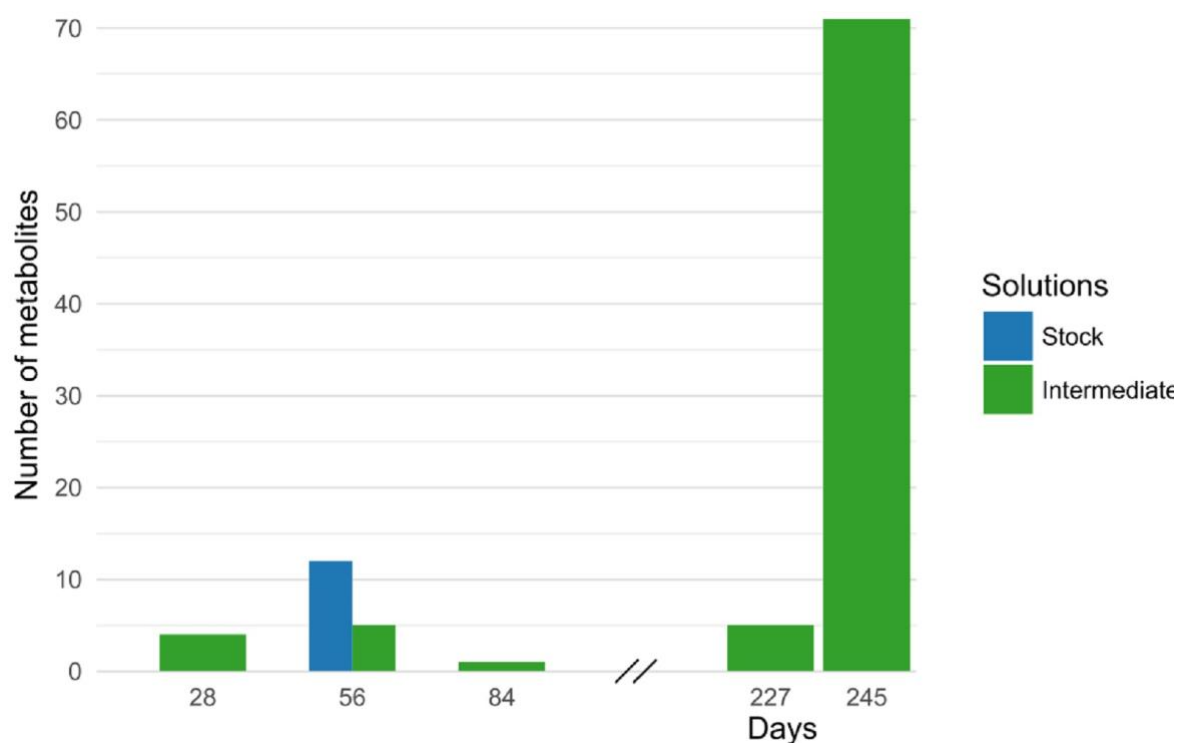

385 **Figure 6.** Bar graph representing stability of stock solutions and intermediate solutions of metabolites  
386 that were used to freshly prepare calibration curve standards during the analysis.

### 387 3.2.5. Sample carryover

388 In general, for majority of the analyte MRM channels neither peak nor any interference in the  
389 blank samples was detected after injection of metabolite standard with high concentration. For  
390 compounds such as spermidine, succinate, AMP, and IMP, carryover eluted constantly even after  
391 washing but was not significantly high. Other than these compounds, we can conclude that the  
392 column, needle, syringe, and seal washes were sufficient to avoid any inter-sample carryover.

### 393 3.2.6. Reproducibility

394 To ensure good quality of the data, internal QC samples were incorporated to a batch of samples  
395 and run after every tenth experimental sample. QC data were collected from 25 different batches that  
396 were performed during various metabolomics studies over a period of 1 year. Mean concentrations  
397 and %CV values of QC replicates within each batch were calculated for all the 25 batches. We  
398 observed that approximately 80% to 85% of the metabolites were always present within 25% of CV  
399 values (Figure 7). The higher %CV values for the remaining metabolites could be partially explained  
400 by low abundance in human serum, low recovery, or poor chromatography; these were consistently  
401 found to be below LLOQ within the 25 batches.

402 In addition, %CV values for retention times and  $R^2$  values of calibration curves for each  
403 metabolite in all the 25 batches were calculated to verify the reproducibility. Based on these results,  
404 the repeatability was excellent except for a few compounds over a period of 1 year. No drifting effect  
405 for the retention times (CV<4%) was observed, and excellent reproducibility was observed for  $R^2$   
406 values of calibration curves (CV<3%) (Figure 8). On the basis of these results, our method can be  
407 considered accurate, reliable, and reproducible.  
408

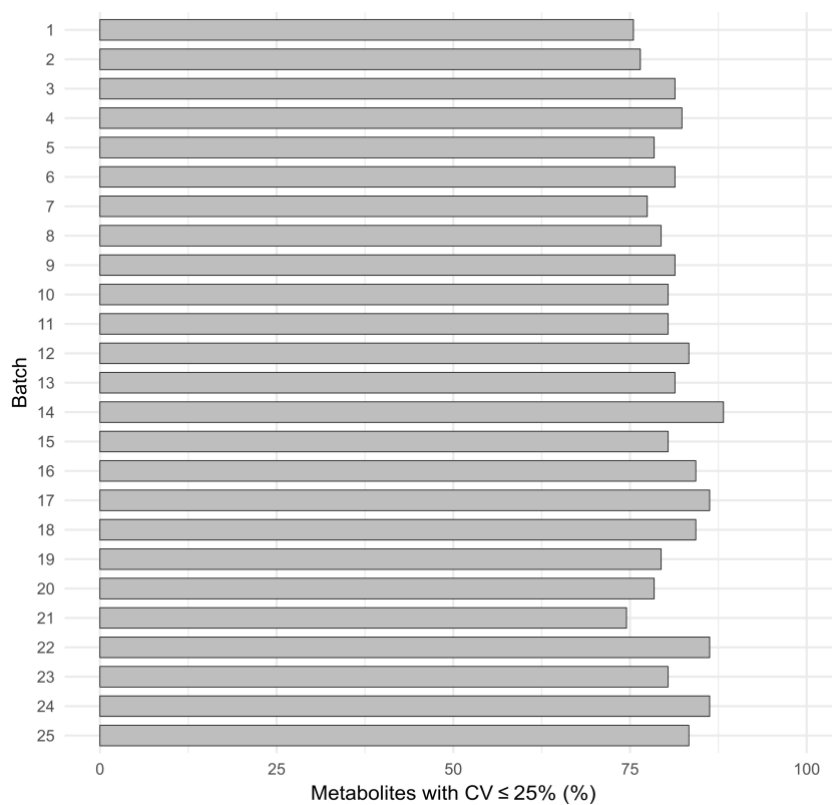

409  
410  
411  
412

**Figure 7.** Percentage of metabolites with less than 25% CV values of QC concentrations in 25 different batches analyzed over a period of 1 year.

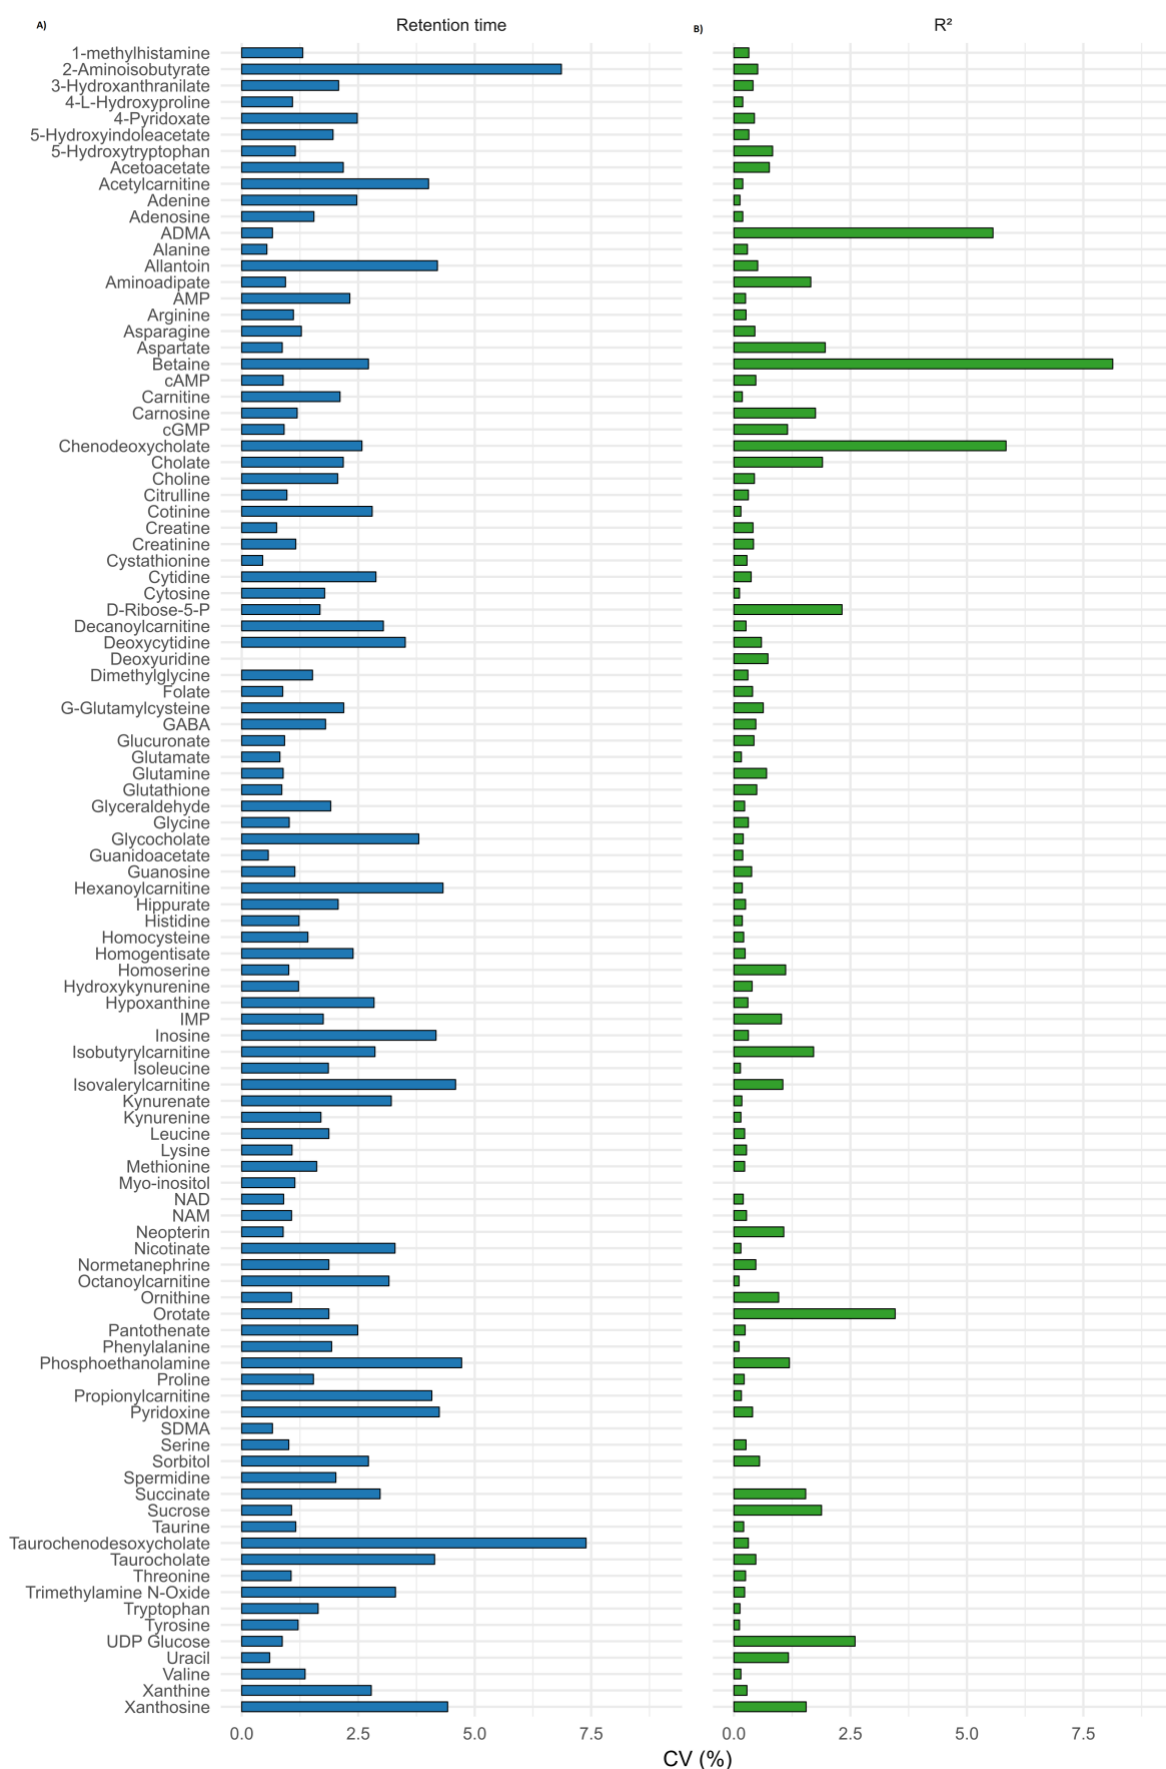

413

414

415

416

**Figure 8.** Reproducibility of (A) retention time of respective chromatographic peaks and (B) regression coefficient values ( $R^2$ ) from external calibration curve standards for each metabolite analyzed in 25 different batches over a period of 1 year.

417 3.2.7. Quality management

418 To obtain reproducible and accurate data, we set up a strict quality management and electronic  
 419 lab notebook system. To reduce the bias from sample analysis, we always double-randomized the  
 420 samples (i.e., one before the sample extraction step and one before injecting into the LCMS system  
 421 across different phenotypes of the samples). For stabilization of response and retention time, we  
 422 always verified a few runs of highest calibration level 11 before injecting the experimental samples.  
 423 During the stabilization process, we also verified the chromatography including peak shape,  
 424 retention time, and response of all the metabolites. Any significant changes in the intensity, peak  
 425 shape, retention time, and system pressure were thoroughly investigated and corrected by resolving  
 426 the problems before injection of experimental samples.

427 To ensure the integrity of LCMS runs, QC samples were run at every tenth experimental sample  
 428 and a blank sample at every fifth run during all the metabolomics studies within a batch.  
 429 Furthermore, chromatography and response of QC samples (including chromatography of some  
 430 metabolites and IS response variation) and blank runs were always verified after completion of the  
 431 runs and before starting data processing. In case of any abnormality observed for particular samples,  
 432 those samples were reinjected or reanalyzed. Only after passing these quality checks we proceed  
 433 further to process the data. This included verifying the accuracy of calibration curve standards,  
 434 chromatography peak integrations, IS response variation, and verifying LLOQ and ULOQ for each  
 435 sample for all metabolites within a batch. The high-throughput targeted metabolomics workflow is  
 436 shown in Figure 9.

437

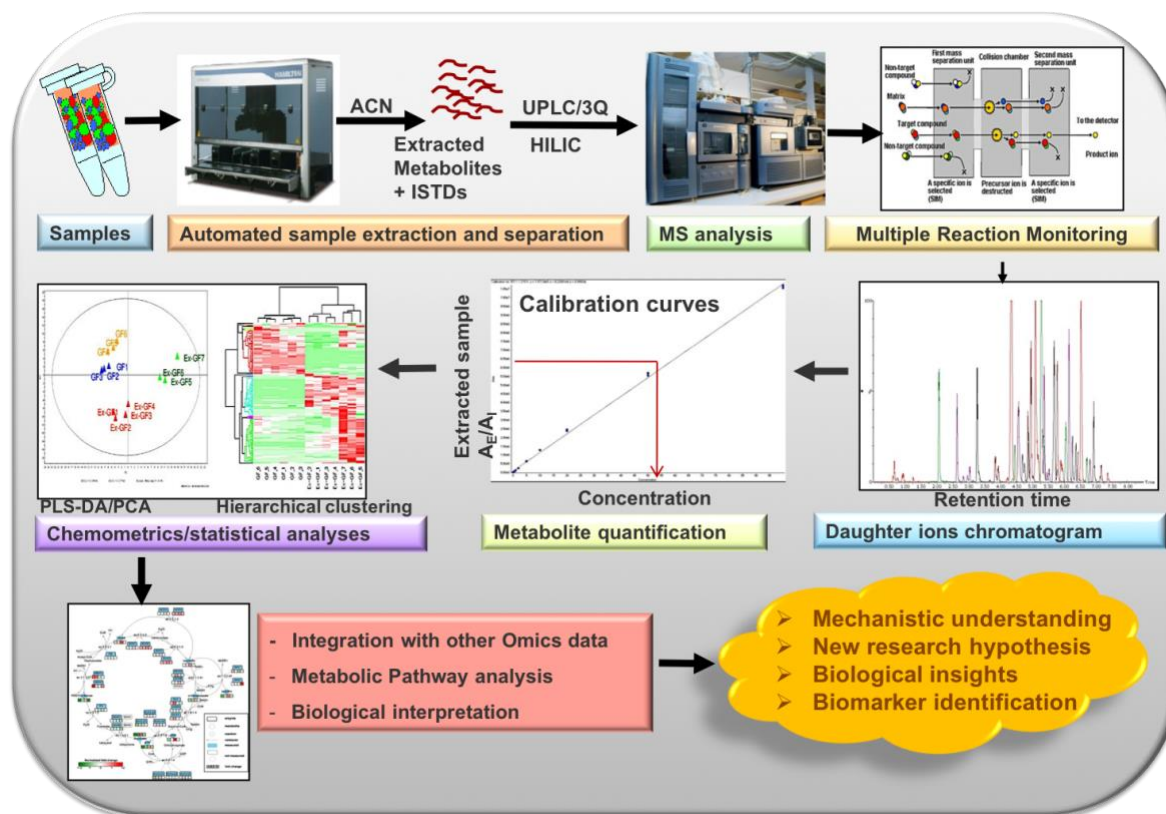

438

439 **Figure 9.** A typical workflow for high-throughput targeted metabolomics analysis.

440

441

442

443

444

445

We collected concentration values ( $\mu\text{mol/L}$ ) for our QC samples within metabolomics studies conducted over a period of 5.5 years from six different lots ( $N=539$  replicates). The median values of each metabolite together with a 95% credibility interval are presented in Table 1. These represent a reference level for a population of healthy adult individuals.

446

**Table 1.** Median concentration levels ( $\mu\text{mol/L}$ ) measured in pooled healthy adult serum samples.

| Class and Metabolite Name                   | HMDB Id     | Estimate | Population median ( $\mu\text{mol/L}$ ) |          |
|---------------------------------------------|-------------|----------|-----------------------------------------|----------|
|                                             |             |          | Lower                                   | Upper    |
| <b>1. Alpha amino acids and derivatives</b> |             |          |                                         |          |
| 2-Aminoisobutyrate                          | HMDB0001906 | 1.128    | 0.809                                   | 1.509    |
| 4-L-Hydroxyproline                          | HMDB0000725 | 15.895   | 11.300                                  | 21.184   |
| 5-Hydroxytryptophan                         | HMDB0000472 | 0.043    | 0.031                                   | 0.058    |
| ADMA                                        | HMDB0001539 | 0.963    | 0.248                                   | 2.230    |
| Alanine                                     | HMDB0000161 | 477.946  | 339.667                                 | 635.383  |
| Amino adipate                               | HMDB0000510 | 2.121    | 1.502                                   | 2.818    |
| Arginine                                    | HMDB0000517 | 84.902   | 60.795                                  | 113.172  |
| Asparagine                                  | HMDB0000168 | 47.204   | 33.635                                  | 62.727   |
| Aspartate                                   | HMDB0000191 | 26.932   | 18.786                                  | 35.424   |
| Betaine                                     | HMDB0000043 | 100.045  | 72.251                                  | 134.758  |
| Citrulline                                  | HMDB0000904 | 27.815   | 19.812                                  | 36.972   |
| Creatine                                    | HMDB0000064 | 61.180   | 44.481                                  | 82.161   |
| Creatinine                                  | HMDB0000562 | 66.085   | 47.095                                  | 88.066   |
| Cystathionine                               | HMDB0000099 | 0.131    | 0.093                                   | 0.174    |
| Dimethylglycine                             | HMDB0000092 | 3.541    | 2.521                                   | 4.733    |
| GABA                                        | HMDB0000112 | 0.195    | 0.138                                   | 0.259    |
| G-Glutamylcysteine                          | HMDB0001049 | 2.966    | 2.116                                   | 3.946    |
| Glutamate                                   | HMDB0000148 | 53.446   | 37.691                                  | 70.613   |
| Glutamine                                   | HMDB0000641 | 791.142  | 560.999                                 | 1050.605 |
| Glutathione                                 | HMDB0000125 | 0.021    | 0.015                                   | 0.028    |
| Glycine                                     | HMDB0000123 | 243.717  | 172.929                                 | 325.417  |
| Guanidoacetate                              | HMDB0000128 | 2.635    | 1.880                                   | 3.498    |
| Histidine                                   | HMDB0000177 | 88.616   | 62.718                                  | 117.848  |
| Homocysteine                                | HMDB0000742 | 0.480    | 0.124                                   | 1.153    |
| Homoserine                                  | HMDB0000719 | 0.337    | 0.240                                   | 0.448    |
| Hydroxykynurenine                           | HMDB0000732 | 0.096    | 0.068                                   | 0.128    |
| Isoleucine                                  | HMDB0000172 | 83.316   | 58.352                                  | 110.232  |
| Kynurenine                                  | HMDB0000684 | 1.146    | 0.813                                   | 1.520    |
| Leucine                                     | HMDB0000687 | 126.072  | 90.139                                  | 167.353  |
| Lysine                                      | HMDB0000182 | 176.519  | 127.474                                 | 236.393  |
| Methionine                                  | HMDB0000696 | 29.201   | 21.081                                  | 39.249   |
| Ornithine                                   | HMDB0000214 | 90.177   | 65.043                                  | 120.796  |
| Phenylalanine                               | HMDB0000159 | 88.326   | 63.916                                  | 117.977  |
| Proline                                     | HMDB0000162 | 251.689  | 180.529                                 | 335.079  |
| SDMA                                        | HMDB0003334 | 2.862    | 2.060                                   | 3.834    |
| Serine                                      | HMDB0000187 | 148.482  | 107.012                                 | 198.507  |
| Threonine                                   | HMDB0000167 | 152.013  | 108.810                                 | 203.651  |
| Tryptophan                                  | HMDB0000929 | 33.961   | 24.104                                  | 45.261   |



|                                                     |             |         |         |         |
|-----------------------------------------------------|-------------|---------|---------|---------|
| Tyrosine                                            | HMDB0000158 | 65.558  | 45.778  | 86.262  |
| Valine                                              | HMDB0000883 | 394.932 | 282.460 | 526.776 |
| <b>2. Benzoic acids and derivatives</b>             |             |         |         |         |
| 3-Hydroxanthranilate                                | HMDB0001476 | 0.188   | 0.134   | 0.251   |
| Hippurate                                           | HMDB0000714 | 6.101   | 4.362   | 8.124   |
| <b>3. Beta amino acids and derivatives</b>          |             |         |         |         |
| Carnosine                                           | HMDB0000033 | 0.014   | 0.010   | 0.019   |
| Pantothenate                                        | HMDB0000210 | 0.310   | 0.220   | 0.411   |
| <b>4. Bile acids, alcohols and derivatives</b>      |             |         |         |         |
| Chenodeoxycholate                                   | HMDB0000518 | 53.661  | 38.588  | 71.987  |
| Cholate                                             | HMDB0000619 | 0.676   | 0.483   | 0.900   |
| Glycocholate                                        | HMDB0000138 | 0.373   | 0.267   | 0.498   |
| Taurochenodesoxycholate                             | HMDB0000951 | 0.507   | 0.359   | 0.673   |
| <b>5. Carbohydrates and carbohydrate conjugates</b> |             |         |         |         |
| D-Ribose-5-P                                        | HMDB0001548 | 1.273   | 0.919   | 1.710   |
| Glyceraldehyde                                      | HMDB0001051 | 239.946 | 172.630 | 322.782 |
| Sucrose                                             | HMDB0000258 | 1.417   | 1.015   | 1.886   |
| <b>6. Dialkylamines</b>                             |             |         |         |         |
| Spermidine                                          | HMDB0001257 | 33.601  | 23.958  | 44.759  |
| <b>7. Dicarboxylic acids and derivatives</b>        |             |         |         |         |
| Succinate                                           | HMDB0000254 | 7.912   | 5.597   | 10.491  |
| <b>8. Fatty Acyls</b>                               |             |         |         |         |
| Acetylcarnitine                                     | HMDB0000201 | 9.709   | 2.323   | 22.264  |
| Decanoylcarnitine                                   | HMDB0000651 | 0.305   | 0.087   | 0.720   |
| Hexanoylcarnitine                                   | HMDB0000705 | 0.055   | 0.015   | 0.129   |
| Isobutyrylcarnitine                                 | HMDB0000736 | 0.248   | 0.061   | 0.578   |
| Isovalerylcarnitine                                 | HMDB0000688 | 0.102   | 0.027   | 0.240   |
| Octanoylcarnitine                                   | HMDB0000791 | 0.297   | 0.076   | 0.691   |
| Propionylcarnitine                                  | HMDB0000824 | 0.423   | 0.119   | 0.998   |
| <b>9. Folates</b>                                   |             |         |         |         |
| Folate                                              | HMDB0000121 | 0.011   | 0.003   | 0.027   |
| <b>10. Glucuronic acid and derivatives</b>          |             |         |         |         |
| Glucuronate                                         | HMDB0000127 | 1.960   | 1.404   | 2.627   |
| <b>11. Imidazoles</b>                               |             |         |         |         |
| 1-Methylhistamine                                   | HMDB0000898 | 0.006   | 0.004   | 0.008   |
| Allantoin                                           | HMDB0000462 | 2.447   | 1.741   | 3.254   |
| <b>12. Indoles and derivatives</b>                  |             |         |         |         |
| 5-Hydroxyindoleacetate                              | HMDB0000763 | 0.074   | 0.053   | 0.099   |
| <b>13. Keto acids and derivatives</b>               |             |         |         |         |
| Acetoacetate                                        | HMDB0000060 | 6.713   | 4.798   | 8.988   |
| <b>14. Organic phosphoric acids and derivatives</b> |             |         |         |         |

|                                        |             |         |         |         |
|----------------------------------------|-------------|---------|---------|---------|
| Phosphoethanolamine                    | HMDB0000224 | 3.316   | 2.356   | 4.420   |
| <b>15. Organosulfonic acids</b>        |             |         |         |         |
| Taurine                                | HMDB0000251 | 221.359 | 156.971 | 294.936 |
| Taurocholate                           | HMDB0000036 | 0.083   | 0.060   | 0.112   |
| <b>16. Oxides</b>                      |             |         |         |         |
| Trimethylamine N-oxide                 | HMDB0000925 | 1.477   | 1.055   | 1.973   |
| <b>17. Phenols</b>                     |             |         |         |         |
| Homogentisate                          | HMDB0000130 | 0.115   | 0.082   | 0.153   |
| Normetanephrine                        | HMDB0000819 | 0.0010  | 0.0007  | 0.0014  |
| <b>18. Pteridines and derivatives</b>  |             |         |         |         |
| Neopterin                              | HMDB0000845 | 0.005   | 0.004   | 0.007   |
| <b>19. Purines and derivatives</b>     |             |         |         |         |
| Adenine                                | HMDB0000034 | 0.007   | 0.005   | 0.009   |
| Adenosine                              | HMDB0000050 | 0.008   | 0.006   | 0.011   |
| AMP                                    | HMDB0000045 | 0.106   | 0.075   | 0.140   |
| cAMP                                   | HMDB0000058 | 0.005   | 0.003   | 0.006   |
| cGMP                                   | HMDB0001314 | 0.009   | 0.002   | 0.026   |
| Guanosine                              | HMDB0000133 | 0.445   | 0.315   | 0.593   |
| Hypoxanthine                           | HMDB0000157 | 58.838  | 41.908  | 78.087  |
| IMP                                    | HMDB0000175 | 0.212   | 0.151   | 0.282   |
| Inosine                                | HMDB0000195 | 36.061  | 25.798  | 48.008  |
| Xanthine                               | HMDB0000292 | 3.926   | 2.790   | 5.211   |
| Xanthosine                             | HMDB0000299 | 0.352   | 0.249   | 0.466   |
| <b>20. Pyridines and derivatives</b>   |             |         |         |         |
| 4-Pyridoxate                           | HMDB0000017 | 0.057   | 0.042   | 0.077   |
| Cotinine                               | HMDB0001046 | 0.531   | 0.382   | 0.710   |
| NAD                                    | HMDB0000902 | 0.015   | 0.011   | 0.020   |
| Niacinamide                            | HMDB0001406 | 0.395   | 0.279   | 0.524   |
| Nicotinate                             | HMDB0001488 | 0.012   | 0.009   | 0.017   |
| Pyridoxine                             | HMDB0000239 | 0.0007  | 0.0005  | 0.0009  |
| <b>21. Pyrimidines and derivatives</b> |             |         |         |         |
| Cytidine                               | HMDB0000089 | 0.003   | 0.002   | 0.004   |
| Cytosine                               | HMDB0000630 | 0.080   | 0.056   | 0.106   |
| Deoxycytidine                          | HMDB0000014 | 0.871   | 0.440   | 1.461   |
| Deoxyuridine                           | HMDB0000012 | 0.543   | 0.391   | 0.726   |
| Orotate                                | HMDB0000226 | 0.036   | 0.006   | 0.096   |
| UDP Glucose                            | HMDB0000286 | 0.232   | 0.165   | 0.308   |
| Uracil                                 | HMDB0000300 | 0.058   | 0.042   | 0.078   |
| <b>22. Quaternary ammonium salts</b>   |             |         |         |         |
| Carnitine                              | HMDB0000062 | 85.669  | 61.210  | 114.060 |
| Choline                                | HMDB0000097 | 95.170  | 67.565  | 126.279 |
| <b>23. Quinolines and derivatives</b>  |             |         |         |         |
| Kynurenate                             | HMDB0000715 | 0.044   | 0.031   | 0.058   |

| 24. Sugar alcohols |             |        |        |        |
|--------------------|-------------|--------|--------|--------|
| Myo-inositol       | HMDB0000211 | 16.989 | 12.075 | 22.606 |
| Sorbitol           | HMDB0000247 | 3.692  | 2.617  | 4.904  |

447 3.2.8. Robustness and cross-platform comparison

448 To verify the performance of our method, we analyzed the NIST standard reference material SRM  
449 1950 plasma. The correlation coefficient for 17 matched metabolites between the given reference  
450 values and from our semi-quantitative method was 0.967, indicating the high performance of our  
451 method (Figure 10A).

452 Furthermore, we verified cross-platform comparability. This was achieved by comparing  
453 metabolite concentrations analyzed using our method against two completely different analytical  
454 platforms (BIOCRATES AbsoluteIDQ p180 kit and NMR) in our QC samples. We obtained a high  
455 correlation coefficient for matched 38 metabolites measured using BIOCRATES AbsoluteIDQ p180  
456 kit and our method ( $R^2=0.975$ ) (Figure 10B) and for matched 22 metabolites measured using NMR  
457 and our method ( $R^2=0.884$ ) (Figure 10C). These results demonstrate the robustness of our method.

458

459

460

461

462

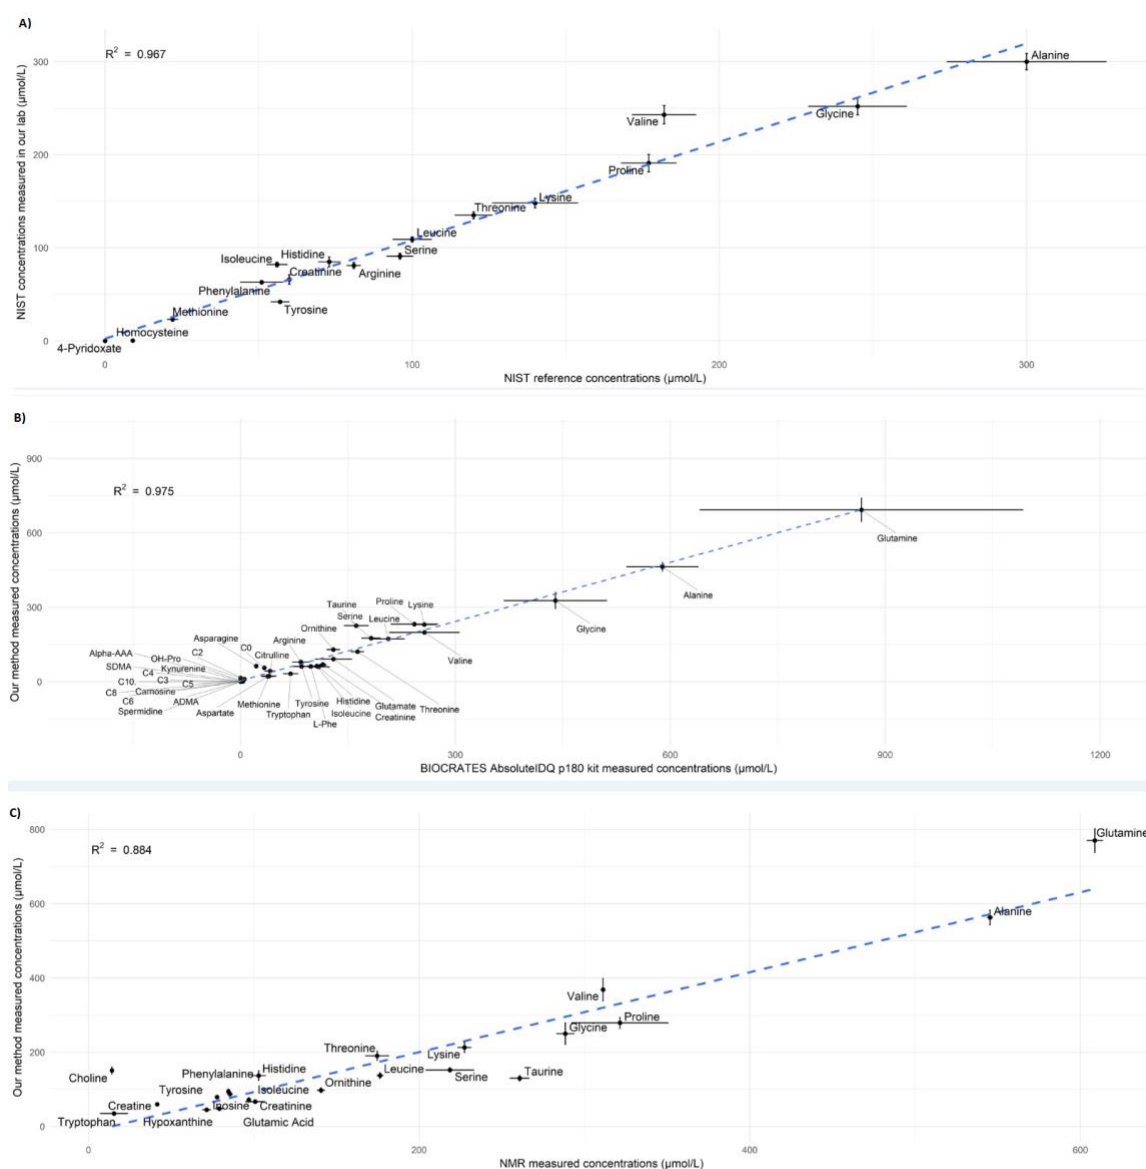

463  
464

465

**Figure 10.** (A) Comparison of metabolite concentration reference values given in the NIST SRM 1950 plasma against our method. Comparison of metabolite concentrations in our QC samples measured between our method and (B) BIOCRAATES AbsoluteIDQ p180 kit, and (C) NMR analyses.

466

Error bars represent 95% confidence intervals.

467

468

469

470

### 3.3 Automated data processing

471

After the raw data processing using the instrument-coupled software (TargetLynx), a single-sheet excel file containing information such as sample ids, file name, and concentrations (PPB) is generated in a complex format for all metabolites. For example, in a single-batch run of 85 samples, after data processing the concentration values for all samples are obtained under each metabolite separately. This means that if a data matrix of 85 samples  $\times$  100 metabolites is desired, each individual concentration value must be copied and pasted in another sheet. PPB values are then converted into  $\mu\text{M}$  and corrected for process efficiencies and dilution factors (if any) and normalized with tissue weight or cell number depending on the sample type. Apart from these steps, as the samples are analyzed in a randomized manner, the next step is to rearrange the experimental samples according to phenotypic group and also to separate the QC samples. Manual data formatting to create a ready-

472

473

474

475

476

477

478

479

480

481 to-use data matrix for visualization and for downstream statistical analyses is a tedious and time-  
482 consuming task and (most importantly) is prone to errors.

483 We have implemented a software package “Unlynx” in R statistical language. This package takes  
484 the raw data produced by TargetLynx software as input and produces processed data into ready-to-  
485 use spreadsheets. Using the R package, all the PPB values are converted into  $\mu\text{mol/L}$ ,  $\mu\text{mol/g}$ , or  
486  $\mu\text{mol/million cells}$  by dividing with molecular weight of the respective metabolites and correction  
487 factor (weight of tissues, number of cells, and dilution factor) with respect to sample types. In  
488 addition, mean concentrations and %CV of QC samples for all the metabolites are calculated and  
489 used to evaluate quality by comparing with the *in-house* QC database constructed based on inter-day  
490 %CV. Furthermore, retrieving LLOQ, ULOQ, and outlier values in each phenotypic group according  
491 to one and two standard deviations, retention time values, and  $R^2$  values for each metabolite is  
492 implemented in the R software. After implementing the automated data processing, we had reduced  
493 the 2-day manual workload to a few minutes.

494 Thus, after processing the data using TargetLynx, we routinely export all results to an excel file  
495 for automated data processing using “Unlynx” software. Typically, the data resulting from such  
496 automated data processing is suitable for more specialized data analyses (such as statistical  
497 hypotheses testing, classification, regression, and clustering) aimed at answering specific scientific  
498 questions related to the study design.

499

### 500 3.4 Applicability of the method

501 We have applied our fully validated analytical methodology in various international and national  
502 biomedical research projects, epidemiological studies, clinical studies including dietary  
503 interventions, and clinical trials. We have successfully implemented our technology in the following  
504 research fields, including but not limited to: mitochondrial metabolism/disorders [11,17-23], cancer  
505 [24,25], bone metabolism [12], endocrinology [26,27], psychiatric disorders [28], inflammatory bowel  
506 disease [29], viral infections [30-33], allergies [34,35], circadian rhythms [36], and pain research [37].

507

## 508 4. Conclusions

509 The developed high-throughput targeted and semi-quantitative method was optimized for various  
510 biological matrices (biofluids, tissues, cells) from different organisms. We validated the analytical  
511 method according to EMA guidelines for bioanalytical methods and showed good accuracy,  
512 reproducibility, selectivity, specificity, recoveries, and stability. We have also implemented a strict  
513 quality management and electronic notebook system. Reproducibility was demonstrated by  
514 consistent results for retention time and correlation coefficient of calibration curves, and  
515 concentrations of QC samples over a period of 1 year. Reliability was shown by the excellent  
516 correlation between metabolite concentrations measured using our method and the NIST reference  
517 values. Moreover, robustness was shown via good cross-platform comparability between two  
518 completely different analytical platforms. Furthermore, we have automated the downstream data  
519 processing steps to handle sample analyses in a high-throughput manner, which is particularly  
520 valuable for analyzing population cohorts and large clinical samples for metabolomics studies. We  
521 have successfully applied this method in many biomedical research projects and clinical trials,  
522 including epidemiological studies for biomarker discovery.

523

524 **Supplementary Materials:** The following are available online at [www.mdpi.com/link](http://www.mdpi.com/link), Table S1: List of  
525 metabolites showing molecular weight, retention time, linearity of calibration, and compound dependent MS  
526 parameters.



527 **Acknowledgments:** The authors would like to thank all the collaborators, especially Prof. Anu Wartiovaara for  
528 providing the biological samples; Jean-Christophe Yorke, Vasudev Kantae, Kenneth Nazir, and Bharat Gajera  
529 for technical assistance, and Dr. Janne Wallenius for reviewing the manuscript. The Biocenter Finland and  
530 HiLIFE supported this work.

531 **Author Contributions:** J.N. performed all the validation experiments, processed the data, and wrote the  
532 manuscript. M.K. and J.N. were involved in extraction protocol optimization. G.P. developed the R package  
533 (Unlynx) for automated data processing. A.P. performed the QC data analysis, prepared the related table, and  
534 wrote the corresponding section. V.V. conceived, designed, and supervised the study, and wrote and edited the  
535 manuscript. All authors edited the manuscript.

536 **Conflicts of Interest:** The authors declare no conflict of interest. The sponsors had no role in the design of the  
537 study; in the collection, analyses, or interpretation of data; in the writing of the manuscript; and in the decision  
538 to publish the results.

539

## 540 5. References

- 541 1. Gowda, G.A.N.; Djukovic, D. Overview of mass spectrometry-based metabolomics: Opportunities and  
542 challenges. *Methods Mol Biol.* **2014**, *1198*, 3-12, DOI:10.1007/978-1-4939-1258-2\_1.
- 543 2. Dudley, E.; Yousef, M.; Wang, Y.; Griffiths, W.J. Targeted metabolomics and mass spectrometry. *Adv*  
544 *Protein Chem Struct Biol.* **2010**, *80*, 45-83, DOI:10.1016/B978-0-12-381264-3.00002-3.
- 545 3. Raterink, R.-J.; Lindenburg, P.W.; Vreeken, R.J.; Ramautar, R.; Hankemeier, T. Recent developments in  
546 sample-pretreatment techniques for mass spectrometry-based metabolomics. *TrAC Trends in Analytical*  
547 *Chemistry* **2014**, *61*, 157-167, DOI:10.1016/j.trac.2014.06.003.
- 548 4. Gong, Z.-G.; Hu, J.; Wu, X.; Xu, Y.-J. The recent developments in sample preparation for mass  
549 spectrometry-based metabolomics. *Crit Rev Anal Chem.* **2017**, *47*, 325-331,  
550 DOI:10.1080/10408347.2017.1289836.
- 551 5. Dettmer, K.; Aronov, P.A.; Hammock, B.D. Mass spectrometry-based metabolomics. *Mass Spectrom Rev.*  
552 **2007**, *26*, 51-78, DOI:10.1002/mas.20108.
- 553 6. Abdel Rahman, A.M.; Pawling, J.; Ryczko, M.; Caudy, A.A.; Dennis, J.W. Targeted metabolomics in  
554 cultured cells and tissues by mass spectrometry: Method development and validation. *Anal Chim Acta.*  
555 **2014**, *845*, 53-61, DOI:10.1016/j.aca.2014.06.012.
- 556 7. Villas-Bôas, S.G.; Mas, S.; Åkesson, M.; Smedsgaard, J.; Nielsen, J. Mass spectrometry in metabolome  
557 analysis. *Mass Spectrom Rev.* **2005**, *24*, 613-646, DOI:10.1002/mas.20032.
- 558 8. Virgiliou, C.; Sampsonidis, I.; Gika, H.G.; Raikos, N.; Theodoridis, G.A. Development and validation of  
559 a hilic-ms/ms multitargeted method for metabolomics applications. *Electrophoresis* **2015**, *36*, 2215-2225,  
560 DOI:10.1002/elps.201500208.
- 561 9. Peng, J.; Chen, Y.-T.; Chen, C.-L.; Li, L. Development of a universal metabolome-standard method for  
562 long-term lc–ms metabolome profiling and its application for bladder cancer urine-metabolite-  
563 biomarker discovery. *Anal Chem.* **2014**, *86*, 6540-6547, DOI:10.1021/ac5011684.
- 564 10. Khan, N.A.; Auranen, M.; Paetau, I.; Pirinen, E.; Euro, L.; Forsström, S.; Pasila, L.; Velagapudi, V.;  
565 Carroll, C.J.; Auwerx, J.; Suomalainen, A. Effective treatment of mitochondrial myopathy by  
566 nicotinamide riboside, a vitamin B3. *EMBO Mol Med.* **2014**, *6*, 721, DOI:10.1002/emmm.201403943.
- 567 11. Roman-Garcia, P.; Quiros-Gonzalez, I.; Mottram, L.; Lieben, L.; Sharan, K.; Wangwiwatsin, A.; Tubio,  
568 J.; Lewis, K.; Wilkinson, D.; Santhanam, B.; Sarper, N.; Clare, S.; Vassiliou, G.S.; Velagapudi,  
569 V.R.; Dougan, G.; Yadav, V.K. Vitamin b12–dependent taurine synthesis regulates growth and bone  
570 mass. *J Clin Invest.* **2014**, *124*, 2988-3002, DOI:10.1172/JCI72606.

- 571 12. Li, K.; Naviaux, J.C.; Bright, A.T.; Wang, L.; Naviaux, R.K. A robust, single-injection method for  
572 targeted, broad-spectrum plasma metabolomics. *Metabolomics* **2017**, *13*, 122, DOI:10.1007/s11306-017-  
573 1264-1.
- 574 13. Liu, P.; Qi, C.-B.; Zhu, Q.-F.; Yuan, B.-F.; Feng, Y.-Q. Determination of thiol metabolites in human urine  
575 by stable isotope labeling in combination with pseudo-targeted mass spectrometry analysis. *Scientific*  
576 *Reports* **2016**, *6*, 21433, DOI: 10.1038/srep21433.
- 577 14. Rosebrock, A.P. Targeted full-scan lc-ms metabolomics: Simultaneous quantitation of knowns and  
578 feature discovery provide the best of both worlds. *Bioanalysis* **2017**, *9*, 5-8, DOI:10.4155/bio-2016-0256.
- 579 15. Wei, R.; Li, G.; Seymour, A.B. High-throughput and multiplexed lc/ms/mrm method for targeted  
580 metabolomics. *Anal Chem.* **2010**, *82*, 5527-5533, DOI:10.1021/ac100331b.
- 581 16. Yuan, M.; Breitkopf, S.B.; Yang, X.; Asara, J.M. A positive/negative ion-switching, targeted mass  
582 spectrometry-based metabolomics platform for bodily fluids, cells, and fresh and fixed tissue. *Nat*  
583 *Protoc.* **2012**, *7*, 872, DOI:10.1038/nprot.2012.024.
- 584 17. Nikkanen, J.; Forsström, S.; Euro, L.; Paetau, I.; Kohnz, R.A.; Wang, L.; Chilov, D.; Viinamäki, J.;  
585 Roivainen, A.; Marjamäki, P.; Liljenbäck, H.; Ahola, S.; Buzkova, J.; Terzioglu, M.; Khan, N.A.; Pirnes-  
586 Karhu, S.; Paetau, A.; Lönnqvist, T.; Sajantila, A.; Isohanni P.; Tynismaa, H.; Nomura, D.K.; Battersby,  
587 B.; Velagapudi, V.; Carroll, C.J.; Suomalainen, A. Mitochondrial DNA Replication Defects Disturb  
588 Cellular dNTP Pools And Remodel One-Carbon Metabolism. *Cell Metab.* **2016**, *23*, 635-648,  
589 DOI:10.1016/j.cmet.2016.01.019.
- 590 18. Ahola, S.; Auranen, M.; Isohanni, P.; Niemisalo, S.; Urho, N.; Buzkova, J.; Velagapudi, V.; Lundbom,  
591 N.; Hakkarainen, A.; Muurinen, T.; Piirilä, P.; Pietiläinen, K.; Suomalainen, A. Modified Atkins diet  
592 induces subacute selective ragged red fiber lysis in mitochondrial myopathy patients. *EMBO Mol Med.*  
593 **2016**, *11*, 1234-1247, DOI:10.15252/emmm.201606592.
- 594 19. Rajendran, J.; Tomašić, N.; Kotarsky, H.; Hansson, E.; Velagapudi, V.; Kallijärvi, J.; Fellman, V. Effect of  
595 high-carbohydrate diet on plasma metabolomics in mice with mitochondrial respiratory chain complex  
596 III deficiency due to a Bcs11 mutation. *Int J Mol Sci.* **2016**, *17*, 1824, DOI:10.3390/ijms17111824.
- 597 20. Szibor, M.; Dhandapani, P.K.; Dufour, E.; Holmström, K.M.; Zhuang, Y.; Salwig, I.; Wittig, I.; Heidler,  
598 J.; Gizatullina, Z.; Gainutdinov, T.; Consortium, G.M.; Fuchs, H.; Gailus-Durner, V.; de Angelis,  
599 M.H.; Nandania, J.; Velagapudi, V.; Wietelmann, A.; Rustin, P.; Gellerich, F.N.; Jacobs, H.T.; Braun, T.  
600 Broad AOX expression in a genetically tractable mouse model does not disturb normal physiology. *Dis*  
601 *Model Mech.* **2017**, *2*, 163-171, DOI:10.1242/dmm.027839.
- 602 21. Schatton, D.; Pla-Martin, D.; Marx, M.C.; Hansen, H.; Mourier, A.; Nemazanyy, I.; Pessia, A.; Zentis, P.;  
603 Corona, T.; Kondylis, V.; Barth, E.; Schauss, A.C.; Velagapudi, V.; Rugarli, E. CLUH regulates  
604 mitochondrial metabolism by controlling translation and decay of target mRNAs. *J Cell Biol.* **2017**, *216*,  
605 675-693, DOI:10.1083/jcb.201607019.
- 606 22. Purhonen, J.; Rajendran, J.; Mörgelin, M.; Uusi-Rauva, K.; Katayama, S.; Krjtskov, K.; Einarsdottir,  
607 E.; Velagapudi, V.; Kere, J.; Jauhainen, M.; Fellman, V.; Kallijärvi, J. Ketogenic diet attenuates  
608 hepatopathy in mouse model of respiratory chain complex III deficiency caused by a Bcs11 mutation.  
609 *Sci Rep.* **2017**, *7*, 957, DOI:10.1038/s41598-017-01109-4.
- 610 23. Khan, N.A.; Nikkanen, J.; Yatsuga, S.; Wang, L.; Jackson, C.; Pessia, A.; Riikka K.; Velagapudi,  
611 V.; Suomalainen, A. mTORC1 Regulates Mitochondrial Folate Cycle and the Integrated Stress Response  
612 in Mitochondrial Disease. *Cell Metab.* **2017**, *26*, 419-428, DOI:10.1016/j.cmet.2017.07.007.

- 613 24. Scott, T.A.; Quintaneiro, L.M.; Norvaisas, P.; Lui, P.P.; Wilson, M.P.; Leung, K.Y.; Herrera-Dominguez,  
614 L.; Sudiwala, S.; Pessia, A.; Clayton, P.T.; Bryson, K.; Velagapudi, V.; Mills, P.B.; Typas, A.; Greene,  
615 N.D.E.; Cabreiro, F. Host-Microbe Co-metabolism Dictates Cancer Drug Efficacy in *C.elegans*. *Cell* **2017**,  
616 *169*, 442-456, DOI:10.1016/j.cell.2017.03.040.
- 617 25. Puhka, M.; Takatalo, M.; Nordberg, M.E.; Valkonen, S.; Nandania, J.; Aatonen, M.; Yliperttula, M.;  
618 Laitinen, S.; Velgapudi, V.; Mirtti, T.; Kallioniemi, O.; Rannikko, A.; Siljander, P.R.-M.; Hallstrom, T.M.  
619 Metabolomic profiling of extracellular vesicles and alternative normalisation methods reveal enriched  
620 metabolites and strategies to study prostate cancer related changes. *Theranostics* **2017**, *7*, 3824-3841,  
621 DOI:10.7150/thno.19890.
- 622 26. Schrade, A.; Kyrönlähti, A.; Akinrinade, O.; Pihlajoki, M.; Häkkinen, M.; Fischer, S.; Alastalo, T.-  
623 P.; Velagapudi, V.; Toppari, J.; Wilson, D.B.; Heikinheimo, M. GATA4 is a key regulator of  
624 steroidogenesis and glycolysis in mouse Leydig cells. *Endocrinology* **2015**, *156*, 1860-1872,  
625 DOI:10.1210/en.2014-1931.
- 626 27. Schrade, A.; Kyrönlähti, A.; Akinrinade, O.; Pihlajoki, M.; Fischer, S.; Rodriguez, V.M.; Velagapudi,  
627 V.; Toppari, J.; Wilson, D.B.; Heikinheimo, M. GATA4 regulates blood-testis barrier function and lactate  
628 metabolism in mouse Sertoli cells. *Endocrinology* **2016**, *157*, 2416-2431, DOI:10.1210/en.2015-1927.
- 629 28. Ali-Sisto, T.; Tolmunen, T.; Toffol, E.; Viinamäki, H.; Mäntyselkä, P.; Valkonen-Korhonen, M.;  
630 Honkalampi, K.; Ruusunen, A.; Velagapudi, V.; Lehto, S.M. Purine metabolism is dysregulated in  
631 patients with major depressive disorder. *Psychoneuroendocrinology* **2016**, *70*, 25-32,  
632 DOI:10.1016/j.psyneuen.2016.04.017.
- 633 29. Kolho, K.-L.; Pessia, A.; Jaakkola, T.; de Vos, W.M.; Velagapudi, V. Fecal and serum metabolomics in  
634 pediatric inflammatory bowel disease. *J Crohns Colitis*. **2017**, *11*, 321-334, DOI:10.1093/ecco-jcc/jjw158.
- 635 30. Fu, Y.; Gaelings, L.; Söderholm, S.; Belanov, S.; Nandania, J.; Nyman, T.A.; Matikainen, S.; Anders,  
636 S.; Velagapudi, V.; Kainov, D.E. NJ872 inhibits influenza A virus replication without altering cellular  
637 antiviral responses. *Antiviral Res.* **2016**, *133*, 23-31, DOI:10.1016/j.antiviral.2016.07.008.
- 638 31. Gaelings, L.; Söderholm, S.; Bugai, A.; Fu, Y.; Nandania, J.; Schepens, B.; Lorey, M.B.; Tynell, J.; Ginste,  
639 L.V.; Goffic, R.L.; Miller, M.S.; Kuisma, M.; Marjomäki, V.; Brabander, J.D.; Matikainen, S.; Nyman,  
640 T.A.; Bamford, D.; Saelens, X.; Julkunen, I.; Paavilainen, H.; Hukkanen, V.; Velagapudi, V.; Kainov, D.E.  
641 Regulation of Kynurenine Biosynthesis during Influenza Virus Infection. *FEBS J.* **2017**, *284*, 222-236,  
642 DOI:10.1111/febs.13966.
- 643 32. Kuivanen, S.; Besselov, M.M.; Nandania, J.; Ianevski, A.; Velagapudi, V.; De Brabander, J.K.; Kainov,  
644 D.E.; Vapalahti, O. Obatoclax, saliphenylhalamide and gemcitabine inhibit Zika virus infection in vitro  
645 and differentially affect cellular signaling, transcription and metabolism. *Antiviral Res.* **2017**, *139*, 117-  
646 128, DOI:10.1016/j.antiviral.2016.12.022.
- 647 33. Bulanova, D.; Ianevski, A.; Bugai, A.; Akimov, Y.; Kuivanen, S.; Paavilainen, H.; Kakkola, L.; Nandania,  
648 J.; Turunen, L.; Ohman, T.; Ala-Hongisto, H.; Pesonen, H.M.; Kuisma, M.S.; Honkimaa, A.; Walton, E.L.;  
649 Oksenych, V.; Lorey, M.B.; Guschin, D.; Shim, J.; Kim, J.; Than, T.T.; Chang, S.Y.; Hukkanen, V.;  
650 Kuleskiy, E.; Marjomaki, V.S.; Julkunen, I.; Nyman, T.A.; Matikainen, S.; Saarela, J.S.; Sane, F.; Hober,  
651 D.; Gabriel, G.; De Brabander, J.K.; Matikainen, M.; Windisch, M.P.; Min, J.Y.; Bruzzone, R.; Aittokallio,  
652 T.; Vähä-Koskela, M.; Vapalahti, O.; Pulk, A.; Velagapudi, V.; Kainov, D.E. Antiviral Properties of  
653 Chemical Inhibitors of Cellular Anti-Apoptotic Bcl-2 Proteins. *Viruses* **2017**, *9*, 271,  
654 DOI:10.3390/v9100271.

- 655 34. Zinkevičienė, A.; Kainov, D.; Girkontaitė, I.; Lastauskienė, E.; Kvedarienė, V.; Fu, Y.; Anders,  
656 S.; Velagapudi, V. Activation of Tryptophan and Phenylalanine Catabolism in the Remission Phase of  
657 Allergic Contact Dermatitis: A Pilot Study. *Int Arch Allergy Immunol.* **2016**, *170*, 262-268,  
658 DOI:10.1159/000450789.
- 659 35. Haapaniemi, E.M.; Fogarty, C.L.; Katayama, S.; Vihinen, H.; Keskitalo, S.; Ilander, M.; Krjutškov, K.;  
660 Mustjoki, S.; Lehto, M.; Hautala, T.; Eriksson, O.; Jokitalo, E.; Velagapudi, V.; Varjosalo, M.; Seppänen,  
661 M.; Kere, J. Combined immunodeficiency with hypoglycemia caused by mutations in hypoxia up-  
662 regulated 1. *J Allergy Clin Immunol.* **2017**, *139*, 1391-1393, DOI:10.1016/j.jaci.2016.09.050.
- 663 36. Rey, G.; Valekunja, U.K.; Feeney, K.A.; Wulund, L.; Milev, N.B.; Stangherlin, A.; Bollepalli,  
664 L.; Velagapudi, V.; O'Neill, J.S.; Reddy, A.B. The Pentose Phosphate Pathway Regulates the Circadian  
665 Clock. *Cell Metab.* **2016**, *24*, 462-473, DOI:10.1016/j.cmet.2016.07.024.
- 666 37. Mäntyselkä, P.; Ali-Sisto, T.; Kautiainen, H.; Savolainen, J.; Niskanen, L.; Viinamäki, H.; Velagapudi,  
667 V.; Lehto, S.M. The association between musculoskeletal pain and circulating ornithine: A population-  
668 based study. *Pain Medicine* **2017**, *18*, 1145-1151, DOI:10.1093/pm/pnw285.
- 669 38. Guideline on bioanalytical method validation. European Medicines Agency: **2011**.
- 670 39. Yamil, S.-M.; Mark, S.L.; Lisa, E.K.; Maureen, L.S.; Kelly, H.T.; Paul, A.R.; William, G.M.; Daniel W.B.;  
671 Tracey, B.S.; Dmitrii, V.T.; Niksa, B.; Xinjian, Y.; Yuxue, L.; Yufang, Z.; William, E.W.; Pedatsur, N.;  
672 Karen, W.P.; Alan, T.R.; Stephen, E.S. Metabolite Profiling of a NIST Standard Reference Material for  
673 Human Plasma (SRM 1950): GC/MS, LC/MS, NMR and Clinical Laboratory Analyses, Libraries and  
674 Web-based resources. *Anal Chem.* **2013**, *24*, 11725-11731, DOI:10.1021/ac402503m.
- 675 40. Siskos, A.P.; Jain, P.; Römisch-Margl W.; Bennett, M.; Achaintre, D.; Asad, Y.; Marney, L.; Richardson,  
676 L.; Koulman, A.; Griffin, J.L.; Raynaud, F.; Scalbert, A.; Adamski, J.; Prehn, C.; Keun, H.C.  
677 Interlaboratory Reproducibility of a Targeted Metabolomics Platform for Analysis of Human Serum  
678 and Plasma. *Anal Chem.* **2017**, *89*, 656-665, DOI:10.1021/acs.analchem.6b02930.
- 679 41. Mihaleva, V.V.; Korhonen, S.P.; van Duynhoven, J.; Niemitz, M.; Vervoort, J.; Jacobs, D.M. Automated  
680 quantum mechanical total line shape fitting model for quantitative NMR-based profiling of human  
681 serum metabolites. *Anal Bioanal Chem.* **2014**, *406*, 3091-3102, DOI:10.1007/s00216-014-7752-5.
- 682 42. Hadfield, J.D. Mcmc methods for multi-response generalized linear mixed models: The mcmcglmm r  
683 package. *Journal of statistical software* **2010**, *33*, 22, DOI:10.18637/jss.v033.i02.
- 684 43. Kimanani, E.K. Bioanalytical calibration curves: proposal for statistical criteria. *J. Pharm. Biomed. Anal.*  
685 **1998**, *16*, 1117-1124, DOI:10.1016/S0731-7085(97)00064-2.

686

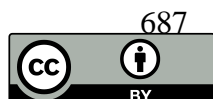

© 2017 by the authors. Submitted for possible open access publication under the terms and conditions of the Creative Commons Attribution (CC BY) license (<http://creativecommons.org/licenses/by/4.0/>).
